# 1 Genetic regulators of mineral amount in Nelore cattle muscle predicted by a new co- 2 expression and regulatory impact factor approach

3

4 Juliana Afonso<sup>1</sup>, Marina Rufino Salinas Fortes<sup>2</sup>, Antonio Reverter<sup>3</sup>, Wellison Jarles da Silva  
5 Diniz<sup>1</sup>, Aline Silva Mello Cesar<sup>4</sup>, Andressa Oliveira de Lima<sup>1</sup>, Juliana Petrini<sup>5</sup>, Marcela M. de  
6 Souza<sup>6</sup>, Luiz Lehmann Coutinho<sup>7</sup>, Gerson Barreto Mourão<sup>4</sup>, Adhemar Zerlotini<sup>8</sup>, Caio  
7 Fernando Gromboni<sup>9</sup>, Ana Rita Araújo Nogueira<sup>10</sup>, Luciana Correia de Almeida Regitano<sup>\*10</sup>

8

9 <sup>1</sup>Department of Evolutionary Genetics and Molecular Biology, Federal University of São Carlos, São Carlos,  
10 Brazil, <sup>2</sup>School of Chemistry and Molecular Biosciences, Faculty of Sciences, The University of Queensland,  
11 Brisbane, Australia, <sup>3</sup>Agriculture and Food, Commonwealth Scientific and Industrial Research Organisation,  
12 Brisbane, Australia, <sup>4</sup>Department of Agroindustry, Food and Nutrition, University of São Paulo/ESALQ,  
13 Piracicaba, Brazil, <sup>5</sup>Department of Statistics, Institute of Exact Sciences, Federal University of Alfenas, Alfenas,  
14 Brazil, <sup>6</sup>Department of Animal Science, Iowa State University, Ames, IA, USA, <sup>7</sup>Department of Animal Science,  
15 University of São Paulo/ESALQ, Piracicaba, Brazil, <sup>8</sup>Bioinformatic Multi-user Laboratory, Embrapa  
16 Informática Agropecuária, Campinas, São Paulo, Brazil, <sup>9</sup>Bahia Federal Institute of Education, Science and  
17 Technology, Ilhéus, Brazil, <sup>10</sup>Embrapa Pecuária Sudeste, São Carlos, Brazil, <sup>\*</sup>Corresponding author.

18 <sup>\*</sup>Correspondence to: [luciana.regitano@embrapa.br](mailto:luciana.regitano@embrapa.br)

19

## 20 Abstract

21

22 Mineral amount in bovine muscle affect meat quality, growth, health and reproductive traits  
23 in beef cattle. To better understand the genetic basis of this phenotype, we implemented new  
24 applications of use for two complementary algorithms: the partial correlation and information  
25 theory (PCIT) and the regulatory impact factor (RIF), by including GEBVs as part of the  
26 input. We used PCIT to determine putative regulatory relationships based on significant  
27 associations between gene expression and mineral amount. Then, RIF was used to determine  
28 the regulatory impact of genes and miRNA expression over mineral amount. We also  
29 investigated over-represented pathways, as well as evidences from previous studies carried in  
30 the same population, to determine regulatory genes for mineral amount *e.g.* *NOX1*, whose  
31 expression was positively correlated to Zn and was described as regulated by this mineral in  
32 humans. With this methodology, we were able to identify genes, miRNAs and pathways not  
33 yet described as important for mineral amount. The results support the hypothesis that  
34 extracellular matrix interactions are the core regulator of mineral amount in muscle cells.  
35 Putative regulators described here add information to this hypothesis, expanding the  
36 molecular relationships between gene expression and minerals.

37

38 Keywords: Nelore, minerals, genes, miRNA, PCIT, RIF.

39

40

## 41 **Introduction**

42

43 Mineral amount affects meat quality [1]–[4], reproduction [5], health and growth  
44 performance [6], [7] in beef cattle and the control of mineral homeostasis depends on genetic  
45 factors, among others [8]. Understanding the genetic aspects linked to mineral amount in  
46 bovine muscle can lead to a better modulation of this trait, allowing for future production of  
47 healthier, more productive animals, and better-quality meat.

48 A differential expression approach detects genes and pathways underlying mineral  
49 amount in Nelore cattle, by comparing extremes of the population used herein [9] [10].  
50 However, as mineral amount traits occur in a continuous distribution, to verify these  
51 relationships and infer regulatory modes of action, it is necessary to study the whole  
52 population. It is possible to go beyond contrasting extreme phenotypes, beyond differential  
53 expression [11]. Thus, by applying a co-expression network approach it is possible to identify  
54 genome-wide genes with similar expression patterns related to specific phenotypes or  
55 conditions. In this methodology, traits are usually integrated into the analysis in a condition-  
56 dependent network, by previous selection of genes or sample clusters related to the trait  
57 before the analysis [12]. Another way of including phenotypes to select gene groups  
58 putatively involved with them, already used for mineral amount in our population [13], is to  
59 cluster all expressed genes by their co-expression profiles and then associate these clusters to  
60 the phenotypes using the Weighted correlation network analysis (WGCNA) iR package [14].  
61 In this case, groups of genes with similar functions are identified and associated with the  
62 phenotypes.

63 Among the challenges of these methods regarding phenotype inclusion is that no  
64 single approach is used to search genome-wide for specific genes linked to phenotypes  
65 without prior selection. Also, it is challenging to pinpoint the direction of interactions or the  
66 regulation, as co-expression networks do not provide this information a priori [12]. To  
67 overcome these limitations, we propose a new application of the partial correlation and  
68 information theory (PCIT) algorithm, originally used for deriving gene co-expression  
69 networks, by identifying significant associations between expression profiles [15].  
70 Additionally, we propose a new application of the regulatory impact factor (RIF) algorithm  
71 [16] to identify significant genes and miRNAs expression with regulatory impact over  
72 mineral amount in bovine muscle. To this end, we used the expression values of genes and  
73 miRNAs correlated to minerals instead of transcription factors (TFs) used in the original  
74 application, allowing the regulatory role to go beyond current functional annotation of the

75 cattle genome. When calculating the RIF of genes and miRNAs with expression correlated  
76 with a mineral over the amount of this mineral, the mineral mass fraction genomic estimates  
77 of breeding values (GEBVs) were used instead of the expression data of selected gene.  
78 Therefore, we were able to use GEBVs on the networks to identify regulatory elements  
79 linked to the phenotypes. This new use of the PCIT-RIF algorithms identified genes and  
80 miRNAs expression related to the mass fraction of calcium (Ca), copper (Cu), potassium (K),  
81 magnesium (Mg), sodium (Na), phosphorus (P), sulfur (S), selenium (Se), zinc (Zn) and iron  
82 (Fe) in Nelore steers' *Longissimus thoracis* muscle. In short, we aimed to predict the  
83 regulatory impact of genes and miRNAs expression over mineral amount in Nelore muscle.

84

## 85 **Results**

86

### 87 **Genes and miRNAs with expression values correlated to minerals**

88

89 After data quality control, filtering, normalization and batch effect correction  
90 performed separately in the mRNA-Seq and miRNA-Seq from 113 samples, the expression  
91 of 12,943 genes and 705 miRNAs remained for further analyses. To identify genes and  
92 miRNAs with expression values correlated to ten different minerals, we carried out two  
93 different PCIT analyses, using our new application: i) PCIT general: incorporating genes,  
94 miRNAs expression and GEBVs together, and ii) PCIT miRNA: considering only miRNAs  
95 expression and GEBVs together. Simultaneously considering the results of both PCIT  
96 analyses, we identified a total of 242 genes and 35 miRNAs with expression values correlated  
97 to at least one mineral GEBV. From these, the expression of 46 genes and 12 miRNAs was  
98 correlated to more than one mineral GEBV. The number of genes and miRNAs with  
99 expression values correlated to each mineral ranged from 19 to 55 and from five to nine,  
100 respectively. The number of miRNAs' expression that were correlated to a mineral in both  
101 PCIT analyses varies from zero to three (Table 1). There were two genes and one miRNA  
102 expression values correlated to six minerals, Vitamin D3 receptor (*VDR*) and bta-miR-92b  
103 correlated to Ca, K, Mg, Na, P and S; and Doublecortin (*DCX*), correlated to K, Mg, Na, P, S,  
104 and Zn. From these analyses, we identified significant correlations among minerals' GEBVs.  
105 There were no significant correlations between Se and other minerals (Figure 1). Correlations  
106 identified among K, Mg, Na, Zn, S, and P GEBVs ranged from 0.77 to 0.97.

107

108

## 109 **Principal component score and Regulatory Impact Factor (RIF)**

110

111 From a principal component analysis based on the GEBVs for each animal,  
112 considering ten minerals, we calculated a score for each sample regarding its contribution to  
113 phenotypic variation. Based on that, we selected 30 contrasting samples concerning all  
114 minerals together, 15 with low score and 15 with high score (Figure 2). These contrasting  
115 groups were used to estimate the RIF of all genes and miRNAs with expression values  
116 correlated to at least one mineral in the amount of all minerals together, using our application  
117 of the original RIF algorithm (see methods). Also, we estimated the RIF of the genes and  
118 miRNAs with expression values correlated to each mineral separately using contrasting  
119 sample groups for specific minerals. For that, based on the GEBVs, we expanded to 15 the  
120 number of samples on the same contrasting groups detailed in previous works with  
121 differentially expressed genes regarding mineral amount [9] [10] containing six samples for  
122 Ca, Cu, K, Mg, Na, P, S, Se and Zn and five samples for Fe in each group.

123 There were 22 genes and two miRNAs with significant RIF based on the high and low  
124 score approach. Based on the single mineral analysis, there were three common genes and  
125 one common miRNA with significant RIF for two minerals, CD86 molecule (*CD86*) for K  
126 and Mg, *VDR* for Mg and Na, WD repeat-containing planar cell polarity effector (*WDPCP*)  
127 for Na and P and bta-miR-369.3p for Ca and S. The number of genes with significant RIFs  
128 for each mineral varied from zero to seven and for miRNA from zero to two (Table 2). The  
129 RIF values of each gene and miRNA presenting significant RIF for each mineral and score  
130 analysis is in Supplementary Table S1.

131

## 132 **Correlation network**

133

134 We used the significant correlations between a gene or a miRNA expression and a  
135 given mineral, identified in both analyses implemented with the PCIT algorithm, as above  
136 described, to derive a co-expression correlation network. To identify potential regulatory  
137 mechanisms related to each mineral, we added on this network other layers of information  
138 from the same samples, tissue and population, as follows: differentially expressed genes  
139 (DEGs) for contrasting mineral amount sample groups [9] [10], transcription factors (TF)  
140 [17] and genes affected by eQTLs [18]. This information and genes with significant RIFs  
141 were used as node attributes and included in the network analyses (Figure 1). All correlations  
142 and attributes necessary to compose Figure 1 are provided (see Supplementary Table S2).

143 There was at least one putative regulatory element (*i.e.* a significant RIF, TF, miRNA, or  
144 gene affected by eQTLs) correlated to each mineral. The number of genes and miRNAs with  
145 expression values correlated per mineral per attribute identified is showed in Table 3 and the  
146 genes, miRNAs and their attributes are showed in Supplementary Table S2.

147 There were no functional clusters or over-represented pathways identified in the  
148 functional annotation analysis carried out separately for each group of genes correlated to a  
149 specific mineral. However, from the functional annotation table, we noted that the gene  
150 expressions correlated to the minerals are well conserved among a broad range of organisms.  
151 They have functions related to the extracellular matrix, integral membrane constituents, metal  
152 ion binding, and partake on regulatory processes linked to transcription, replication, splicing,  
153 apoptotic processes, metabolism, transport vesicles, RNA processing, signaling, cell division,  
154 adhesion, migration and proliferation, embryonic development and tissue regeneration.

155

### 156 **Integration with differentially expressed genes (DEGs)**

157

158 To convey the relationship among all genetic elements related to mineral mass  
159 fraction detected in our population, we used PCIT to estimate the correlations between a gene  
160 or miRNA expression that was found to be correlated to a given mineral in the present work  
161 and DEGs previously identified for the same mineral [9] [10]. This analysis was carried out  
162 for each mineral separately and included the same genes with regulatory potential as in the  
163 previous section (DEGs [9] [10], TFs [17], genes affected by eQTLs [18] and genes with  
164 significant RIF). To identify elements with regulatory potential, we then selected the genes  
165 that were network hubs or that were significant according to RIF (see methods). We  
166 performed a functional annotation analysis with the selected genes for each mineral,  
167 separately, to determine which ones were underlying biological pathways.

168 The expression of all selected putative regulatory elements (hub, significant RIF or  
169 miRNA), the ones underlying biological pathways newly identified and the ones being part of  
170 enriched pathways in previous work with DEGs related to mineral amount [9] [10] were used  
171 as inputs for a final PCIT analyses. This PCIT was carried to identify possible regulators of  
172 genes in enriched pathways. Figure 3 shows the co-expression networks built with significant  
173 correlations from the final PCIT analyses for Ca, Cu, K, Mg, Na, P, S, Se, and Fe.  
174 Supplementary Tables S3 has the correlations and attributes related to creating Figure 3.

175 As we included the differentially expressed genes regarding mineral amount  
176 previously detected in in the same population [9] [10], most of the over-represented pathways

177 identified correspond to the previously detected pathways expression analyses. In addition,  
178 by the inclusion of correlated genes and pathways from the Reactome database [19], we  
179 identified new pathways for K, related to protein metabolism, for Ca, Cu, S and Fe related to  
180 immune response, and for S related to signaling. All the pathways enriched for S are new,  
181 when compared with our previous work [9]. A list of the pathways enriched for each mineral  
182 considering the ones detected with the inclusion of correlated genes expressions and the ones  
183 from the previous work [9] [10] is shown in Table 4.

184         Regarding Zn, no gene taking part in the unique enriched pathway previously detected  
185 [9] met our criteria. Because of that, for this mineral, we generated a co-expression network  
186 by including the DEGs for Zn [9] that had their expression values significantly correlated to  
187 hub or RIF elements for Zn and their attributes, in order to identify possible regulators for the  
188 DEGs in general. This co-expression network is shown in Figure 4, and the correlations and  
189 attributes supporting Figure 4 are presented in Supplementary Table S4.

190

## 191 **Discussion**

192

### 193 *Relationship among minerals*

194

195         Correlations identified among GEBVs for most minerals were high (0.77 to 0.97).  
196 Thus, a word of caution must inform this discussion of all genes and miRNAs with  
197 expression values correlated to each mineral, as correlated responses across minerals may  
198 underlie the identified genes and miRNAs, as well as their predicted relationships. All  
199 minerals, except Se, were correlated among themselves and all of them revealed genes in  
200 common, in the correlation network. In this network, the link between Se and the other  
201 minerals was Zn, through the common correlation with the NADPH oxidase 1 (*NOX1*) gene  
202 expression, which had significant RIF results for Zn. *NOX1* expression was positively  
203 correlated to Zn and negatively to Se. Accordingly, Zn positively regulates NOX1 protein  
204 expression in humans, since an increase in Zn leads to a Zn accumulation in the  
205 mitochondria. This accumulation increases the production of reactive oxygen species which  
206 activates NF-Kb, a known positive transcriptional regulator of *NOX1*, thus increasing its  
207 expression [20]. Moreover, Se deficiency is known to induce the oxidation of NrX, a  
208 transmembrane protein, by the accumulation of H<sub>2</sub>O<sub>2</sub>, which is catalyzed by the NOX1  
209 protein [21]. As the Se deficiency and the H<sub>2</sub>O<sub>2</sub> accumulation catalyzed by the NOX1  
210 protein act in the same known biochemical process, this could explain the negative

211 correlation found in our analysis. Further, the oxidation of NrX protein leads to the activation  
212 of the Wnt signaling pathway [21], that can act in adult muscle regeneration [22], an evidence  
213 for the relevance of this regulation for muscle homeostasis. Another link between Se and Zn  
214 were the correlations with three miRNAs expressions: bta-miR-411c-5p (with significant RIF  
215 for Zn), bta-miR-2285co and bta-miR-2285bl, although no literature relates these miRNAs to  
216 Se or Zn amount, nor to the genes related to these minerals in our analysis.

217 Fe exhibited a weak correlation with Mg, K, P, and S (from 0.25 to 0.31,  $p < 0.05$ )  
218 and was linked to other minerals through S, sharing negative correlations with the expression  
219 of 1-phosphatidylinositol 4,5-bisphosphate phosphodiesterase gene (*PLCB2*). *PLCB2* protein  
220 is critical to Ca efflux [23], although no correlation with Ca amount was found in our data,  
221 nor in our previously reported DEGs [9]. The relationship of *PLCB2* gene expression with Fe  
222 and S is undocumented, although Fe was reported to cleave the *PLCB2* protein in the cornea  
223 of bovine, porcine and humans [24]. The *PLCB2* gene is affected by 61 trans eQTLs,  
224 harbored across 12 chromosomes [18], making these eQTL regions candidates to regulate  
225 this gene expression and consequently Fe and S mass fractions in the muscle.

226

#### 227 *PCA score analyses identified regulators of mineral composition*

228

229 Our score successfully detected contrasting samples regarding all minerals together,  
230 allowing for the identification of genes and miRNAs with significant overall RIFs.  
231 Considering these genes and the functional enrichment analysis, we identified well-conserved  
232 functions for 14 out of 22 genes. From these, we can highlight three with functions related to  
233 minerals: Delta-aminolaevulinic acid dehydratase (*ALAD*) encodes a metal ion binding  
234 protein linked to Zn, Zinc finger CCHC domains-containing protein 7 (*ZCCHC7*), which  
235 encodes a chaperone and Zn finger protein, while Myosin light chain kinase 3 (*MYLK3*) is  
236 part of the Ca signaling pathway that participates in muscle contraction.

237 Mutations in the *ALAD* gene were linked to the phenotypic expression of potentially  
238 toxic metal by fly ash exposure in cattle born near thermal power plants, being pointed as a  
239 candidate for genomic studies related to metal toxicity [25]. Our results indicated that *ALAD*  
240 is a candidate linked to minerals in general, including potentially toxic metals.

241

242

243

244

245 *Functional analyses and the search of regulatory elements*

246

247 Functional annotation analyses, performed based on the genes with expression values  
248 correlated to each mineral, showed no functional clusters nor enriched pathways for any  
249 mineral. However, some of these genes' expressions were correlated with DEGs partaking in  
250 different pathways and are themselves part of these pathways, which lead us to hypothesize  
251 that the remaining genes of the pathways may be modulated in less intensity. This agrees with  
252 the small QTL effects already observed for mineral amount [26]. The function annotation for  
253 each gene separately showed membrane proteins and extracellular matrix (ECM) related  
254 proteins as common annotation for many genes. This observation helps to corroborate the  
255 hypothesis that ECM interactions are at the regulatory core for the mineral mass fraction [9].  
256 ECM pathways were enriched for co-expressed groups of genes related to mineral mass  
257 fraction and meat quality traits in this Nelore population [13].

258 When components of a specific pathway are known, a guided-gene approach in a co-  
259 expression network can help to identify new genes for the same pathway-related-trait [27],  
260 and a pre-selection of genes by biological meaning can improve the network interpretation  
261 [12]. Our selection based on enriched pathways, TFs, and significant RIF allowed the  
262 inference of genes and miRNAs with a regulatory potential in these pathways. We identified  
263 high correlations among these selected elements when compared with the correlations among  
264 unselected genes/miRNAs and minerals or considering all genes/miRNAs correlated to a  
265 mineral and their respective DEGs. These high correlations and the presence of genes related  
266 to regulatory processes reinforces that our methodology can be used to drive the search for  
267 meaningful regulatory relationships.

268

269 *Potential regulators for more than one mineral*

270

271 Genes with significant RIF and genes with expression values correlated to others that  
272 belong to enriched pathways are the potential regulators. These candidate genes may  
273 modulate mineral mass fraction by affecting their target genes and pathways. For the minerals  
274 presenting enriched pathways, except Zn, the elements with significant RIFs were connected  
275 with miRNAs, correlated genes expressions, TFs and genes being affected by trans eQTLs.  
276 They were also part of enriched pathways, reinforcing their regulatory role on the  
277 phenotypes. The intricate patterns obtained in these network analyses arise from the fact that  
278 the same genes are part of different pathways.



279 As expected, the pathways identified by considering gene expression correlation with  
280 mineral GEBVs were often the same already reported in the differential expression study [9].  
281 The pathways with functions related to ECM processes and protein metabolism were  
282 enriched for almost all minerals, except Se, Fe, and Zn. These results also corroborate our  
283 previous hypothesis that the regulatory core of mineral amount is linked to ECM processes  
284 [9]. Pathways related to fatty acid metabolism were enriched for Cu, as reported in that  
285 previous study. However, with the inclusion of the genes with expression values correlated to  
286 the minerals, pathways linked to immune responses were enriched for Ca, Cu, Fe, and S. The  
287 pathways enriched for S, related to signal transduction and immune response, were not  
288 detected in the previous cited work, emphasizing that the integrative approach used herein  
289 can bring up new evidences of regulatory processes not identified under the differential  
290 expression analysis.

291 We identified putative regulators that might impact more than one mineral. Cluster of  
292 differentiation 86 gene (*CD86*) showed a significant RIF and was a hub gene for Mg and K  
293 analyses. The gene *CD86* encodes a protein signaling for T cell activation and proliferation  
294 [28] and is linked to T cell adhesion after activation [29]. A Mg sensor, ITK, seems to be  
295 required for optimal T cell activation [30] and K<sup>+</sup> channels are involved in T cell activation,  
296 after the binding of the CD86 protein in the CD28 receptor [31], putatively explaining the  
297 relationship among these two minerals and *CD86*. The PI3k-akt signaling pathway is  
298 activated after this protein-receptor binding in an antigen-presenting cell, leading to  
299 downregulation of integrins, participants of the pathways enriched for these two minerals  
300 [32]. For both minerals, Mg and K, the known roles of *CD86* support the idea that this is a  
301 regulator for the enriched pathways.

302 The Vitamin D receptor (*VDR*), is a TF with significant RIF for Mg and Na. *VDR*  
303 expression has a known relationship with Ca metabolism [33], and it was correlated to this  
304 mineral, but it was not identified here as a putative regulator for Ca based on the RIF score.  
305 Mg is essential to vitamin D activation, once both enzymes involved in this process, 25-  
306 hydroxylase and 1 $\alpha$ -hydroxylase, are Mg-dependent [34]. *VDR* expression link with Na is not  
307 extensively documented. A putative role of this encoded receptor in the increased Ca  
308 absorption and/or reduced Ca loss in menopause women containing no f alleles of the *VDR*  
309 gene under a Na and protein-rich diet was reported [35]. The relationship between this gene  
310 expression and the ECM processes-related pathways enriched for both minerals seems to be  
311 the interaction of the *VDR* receptor with the Runx2 receptor which, in mammals, stabilizes  
312 chromatin remodelers by activating genes involved in ECM mineralization [36].

313           WD repeat-containing planar cell polarity effector (*WDPCP*) is a gene with  
314 significant RIF for Na and P and was affected by one trans eQTL in chromosome five [18].  
315 The *WDPCP* gene encodes a protein that inhibits Wnt activity [37], whose pathway acts in  
316 adult muscle regeneration [22], and is activated by high P amounts [38]. ECM processes-  
317 related pathways were also enriched for these minerals. ECM stiffness increases the  
318 expression of several members of the Wnt pathway through integrins and focal adhesion  
319 pathways [39], thus relating the *WDPCP* gene expression with the enriched pathways. The  
320 link between *WDPCP* expression and Na is not known. In both minerals, Na and P, *WDPCP*  
321 expression value is correlated positively (0.19) with the TF *VDR* expression that represses the  
322 Wnt pathway [40].

323           The miRNA bta-miR-369-3p had a significant RIF for Ca and S. The genes with  
324 expression values correlated to this miRNA are not known targets to it. This miRNA  
325 expression levels increases in skin and serum of humans with psoriasis [41]. A homolog of  
326 psoriasin, a common protein in psoriasis patients, was identified in bovines and have the  
327 same antimicrobial and immune response activity as the human one [42]. Psoriasis trigger  
328 seems to be the activation of the cellular immune system [43], probably explaining why the  
329 bta-miR-369-3p expression level was correlated to several genes involved in immune  
330 pathways for Ca and S. Further, Ca and vitamin D play important roles in keratinocyte  
331 differentiation and regulate proteins involved in psoriasis [44] and S is used as a known  
332 treatment and prevention of recurrence for this disease [45]. Our results suggest the genes  
333 expressions correlated to bta-miR-369-3p expression as non-described candidate targets of  
334 this miRNA, linked to immune response and mineral concentration.

335

### 336 *Potential regulators for a specific mineral concentration*

337

338           Some putative regulators showed significant RIF for only one mineral. The miRNA  
339 bta-let-7i showed significant RIF for Mg and one of the correlated genes, Collagen alpha-1  
340 (XI) chain (*COL11A1*) is a target of this miRNA. The *COL11A1* gene is a DEG, associated to  
341 protein digestion and absorption, as well as, to ECM receptor interaction. This gene encodes  
342 a collagen protein, the most abundant protein in ECM. *COL11A1* expression is correlated to  
343 Mg, which stimulates collagen synthesis [46], and its expression is correlated to other genes  
344 expressions being part of the same or related pathways. Cystathionine gamma-lyase (*CTH*) is  
345 also a gene with significant RIF just for Mg. This gene expression is correlated to a Zn finger

346 protein of the cerebellum (*ZIC3*), a TF, which was correlated to the already mentioned *CD86*  
347 gene expression, also associated with Mg herein.

348 We identified two genes with significant RIF specifically for K: Matrix  
349 metalloproteinase (*MMP16*) and E3 ubiquitin-protein ligase (*RNF34*). The gene *MMP16*  
350 encodes a protein whose family is involved in the breakdown of ECM, mostly of collagen  
351 genes [47], explaining its link to the enriched pathways related to ECM organization and its  
352 correlation with Collagen type XXI alpha 1 chain (*COL21A1*). Both *MMP16* and *RNF34*  
353 expressions were correlated to *CD86* expression, for which the link to K was already  
354 discussed. *RNF34* encodes a RINF finger protein that negatively regulates the NOD1  
355 pathway, involved in receptors activating immune responses, similar to *CD86*. Bta-miR-92b  
356 expression was correlated to seven genes expressions, and one of them, *MMP16*, is a known  
357 target for this miRNA regulation, which could explain the relationship of this miRNA with  
358 the over-represented pathways.

359 For Na, we identified six genes with significant RIF: *WDPCP* and *VDR*, linked to the  
360 already discussed ECM processes, Vimentin type intermediate filament associated coiled-coil  
361 protein (*VMAC*), Cyclin-dependent kinase inhibitor 3 (*CDKN3*), Centromere protein E  
362 (*CENPE*), and Calcium/calmodulin-dependent protein kinase kinase 1 (*CAMKK1*). *VMAC*  
363 intermediates filament, play an important role in cytoskeletal organization [48]. Cell  
364 adhesions, mediated by integrins, link ECM and cytoskeleton [49]. *CDKN3* encodes a  
365 cycling-dependent kinase inhibitor that is involved in cell cycle regulation [50], a process  
366 where integrins act [51]. The presence of an integrin gene, integrin subunit alpha 10  
367 (*ITGA10*) in the network, as well as actin interactions, could explain the link of these two  
368 genes and the ECM-related pathways for Na. Na presents a miRNA with significant RIF, bta-  
369 miR-125a, presenting its expression values correlated to two genes with significant RIF,  
370 *WDPCP* and *VMAC*, and the integrin gene *ITGA10*. This miRNA targets *VMAC* who is also  
371 affected by six trans eQTLs in chromosome six, being candidates to future studies.

372 The miRNAs bta-miR-25 and bta-miR-378c had significant RIF for Fe. Their  
373 expression values were correlated to each other, to other miRNAs expression and, as with  
374 other miRNA found in our results, the genes expressions correlated to them were not  
375 described as their targets. Both miRNAs expressions were correlated to *ALAD* gene  
376 expression, also a hub gene in the Fe network. Fe amount in the extracellular environment  
377 positively affects *ALAD* protein level and activity [52]. The relationship with the immune  
378 response pathways enriched for Fe seems to be in the proteasome involvement in these

379 pathways. ALAD protein modulates proteasome activity [53], and proteasome function can  
380 shape innate and adaptative immune responses [54].

381 Lysophosphatidic acid receptor 4 (*LPAR4*) is a hub gene with significant RIF for Ca,  
382 already known to positively regulate cytosolic Ca amount involved in phospholipase C-  
383 activating G protein-coupled signaling pathway (GO:0051482). Its expression is linked in our  
384 network to MAF BZIP transcription factor B (*MAFB*) expression, a TF that interacts with  
385 Gcm2 and modulates parathyroid hormone, which in turn regulates Ca mass fraction [55].  
386 These genes expressions were correlated to other six genes expression. Three of them were  
387 DEGs for Ca being part of pathways involved in ECM processes, and the other three were  
388 hub genes. From these hub genes, Bcl-2-modifying factor (*BMF*) regulates apoptosis after  
389 cell detachment from the ECM [56].

390 We identified the RAS like family 11 member A (*RASL11A*), which encodes a RAS  
391 protein, with significant RIF for Cu. This gene expression was correlated mainly to the  
392 expression of genes involved in fatty acid metabolism, a process where Cu is a known  
393 enzymatic co-factor [57]. RAS proteins' posttranslational modifications are affected by fatty  
394 acids [58], possibly explaining the link of this gene expression with the fatty acid-related  
395 proteins.

396 For S, we identified Fucosyltransferase 8 (*FUT8*), RAB44 member RAS oncogene  
397 family (*RAB44*), Proline-rich and gla domain 3 (*PRRG3*), Protein-lysine methyltransferase  
398 METTL21E (*METTL21E*), and Phospholipid phosphatase related 5 (*PLPPR5*) genes with  
399 significant RIF, presenting their expression values correlated or being part of immune  
400 response and signal transduction pathways. Sulfur amino acids affect inflammatory aspects of  
401 the immune system [59]. Although there is no primary connection between *FUT8* and *RAB44*  
402 proteins and the immune system, these proteins contribute to tumor progression [60] [61], in  
403 which a robust immune response is involved [62]. *PRRG3* encodes a vitamin K-dependent  
404 transmembrane protein with a GLA domain, involved in coagulation factors [63], a process  
405 that is linked to the innate immune system [64]. Regarding signal transduction pathways,  
406 *METTL21E* was linked to signaling pathways in mouse siRNA experiments [65], and  
407 *PLPPR5* encodes a protein member of the phosphatidic acid phosphatase family, acting in  
408 phospholipase D mediating signaling [66]. The bta-miR-500, who presented a significant RIF  
409 for S is a known regulator of the genes whose mRNA levels were correlated to this miRNA  
410 in our analysis.

411 For Se, all enriched pathways were related to ECM interactions and protein digestion  
412 and absorption. For this mineral, we identified six annotated genes with significant RIF,

413 Thyrotroph embryonic factor (*TEF*), Zn finger DBF-type containing 2 (*ZDBF2*),  
414 Tetratricopeptide repeat domain 21 (*TTC21A*), Histidyl-tRNA synthetase (*HARS*), DTW  
415 domain containing 1 (*DTWD1*), and Pyruvate dehydrogenase kinase 3 (*PK3*). *TEF* is a TF  
416 and a leucine zipper protein [67], whose family is required for the activation of DDRs  
417 receptors, essential to matrix remodeling [68]. *PK3* encodes an enzyme responsible for the  
418 regulation of glucose metabolism, among many other functions, is related to ECM  
419 remodeling [69]. We could not find a link among *ZDBF2*, *HASR*, and *DTWD1* genes  
420 expression and Se or the enriched pathways. They are candidates for future studies regarding  
421 these potential relationships.

422         Regarding Zn, even without over-represented pathways, it is possible to infer that the  
423 six elements presenting significant RIF are putatively regulators of several correlated genes  
424 expressions and a few DEGs, as already discussed by *NOXI*. From the six genes with  
425 significant RIF, Membrane-bound transcription factor peptidase, site 2 gene (*MBTPS2*) is  
426 also a hub gene encoding an intramembrane Zn metalloprotease and *TNR* encodes an ECM  
427 glycoprotein. This information can lead to the assumption that ECM processes can also be  
428 associated to Zn amount, as they putatively do to most of the other minerals in study [9].

429

430 *New application for PCIT and RIF algorithms*

431

432         The first co-expression network, containing genes and miRNAs expressions  
433 correlated to the mass fraction of at least one mineral, is considered to be a correlation  
434 network among elements from two different sources: sequencing (mRNA-Seq and miRNA-  
435 Seq) and a measure referring to the trait of interest, the minerals` GEBVs. Originally, outputs  
436 from PCIT algorithm forms co-expression networks based on significant correlations between  
437 gene and miRNA expression levels. PCIT works in two steps: first, a partial correlation is  
438 calculated for every trio of genes/miRNAs based on the expression values of these elements  
439 in a specific set of samples, giving us the strength of the linear relationship between every  
440 two items, independent of the third one. In the end, PCIT calculates, for each trio of genes  
441 expression, the average ratio of partial to direct correlations. This value is set as the  
442 information theory threshold for significant associations, not the same for every analysis,  
443 specific for each trio [15]. Statistically, both steps can be used to test the correlation and the  
444 significance threshold of other genetic elements, if they vary in the population. Thus, there is  
445 no statistical impediment of using PCIT in the way proposed here, to detect genes and  
446 miRNAs whose expression values variate in our samples in correlation with the minerals`

447 GEBVs, as proposed here, since they already represent just the additive genetic effect of the  
448 traits [26].

449 The RIF algorithm was developed to calculate the impact of TFs over a selected list of  
450 genes through the expression values of genes and TFs across samples, in two contrasting  
451 groups for the studied phenotype (in our case, minerals). This impact factor is calculated in  
452 two ways (RIF 1 and RIF 2). RIF 1 gives high scores to TFs that are most differentially co-  
453 expressed, highly abundant, and with more expression difference between the groups. RIF 2  
454 gives a high score to TFs for which the expression can predict better the abundance of DEGs  
455 [16]. Again, there is no impediment in the analytical methodology to use other genetic  
456 information, *e.g.*, GEBVs, since it variates in the population. In our application, we used  
457 genes and miRNAs with expression values correlated to at least one mineral in the place of  
458 TFs, and GEBVs were used instead of selected genes. In this case, RIF 1 gives a high score to  
459 the genes or miRNAs that are most differentially co-expressed, highly abundant and with  
460 more expression difference between the contrasting groups (mineral specific groups and  
461 score-based groups, separately) and RIF 2 to genes and miRNAs for which the expression  
462 can predict better the magnitude of the GEBVs. Together, both new applications can be used  
463 to predict genes and miRNAs expressions correlated to mineral mass fraction and to pinpoint  
464 which ones have a regulatory impact over mineral amount.

465

## 466 **Conclusion**

467

468 By using a modification of the PCIT/RIF methodology, we were able to predict  
469 regulatory elements related to the mineral amount of ten minerals, indicating over-represented  
470 pathways linked to the mass fraction of each mineral and putative regulators that are mineral  
471 specific. Our analyses corroborate the link between mineral amounts and the ECM processes,  
472 including a relationship with Zn not seen in our previous analysis. In our proposed approach,  
473 PCIT can be applied to predict the relationship between gene transcripts or miRNAs and  
474 phenotypes, in a genome-wide fashion. Similarly, RIF may predict the regulatory impact of  
475 mRNAs and miRNAs levels over phenotypes. This new approach can be applied for any  
476 phenotype that is of interest for genomic selection and livestock breeding.

477

## 478 **Methods**

479

480 Figure 5 contains a flowchart of the steps of our methodology.

## 481 **Samples**

482

483 The Ethical Committee of Embrapa Pecuária Sudeste (São Carlos, São Paulo, Brazil)  
484 approved all experimental and animal protocols (CEUA 01/2013). We used the GEBVs from  
485 mineral mass fraction [26] and the mRNA-Seq [10], and miRNA-Seq [70] data from 113  
486 samples of *Longissimus thoracis* muscle from Nelore steers that are part of the population  
487 already described in previous differential expression analysis related to mineral amount [9]  
488 [10].

489 The animals forming our samples came from a Nelore steer population described  
490 elsewhere [26], [71]. In summary, all animals come from half-sibling families, generated by  
491 artificial insemination in two different farms, transferred to Embrapa Pecuária Sudeste (São  
492 Carlos, São Paulo, Brazil) and maintained in feedlot system with *ad libitum* feed and water  
493 access until slaughter, approximately 70 days after the start of the confinement, where the  
494 muscle sample collection was done.

495

## 496 **Mineral mass fraction and genetic estimated breeding value (GEBV)**

497

498 Calcium (Ca), copper (Cu), potassium (K), magnesium (Mg), sodium (Na),  
499 phosphorus (P), sulfur (S), selenium (Se), zinc (Zn) and iron (Fe) mass fractions were  
500 determined from lyophilized and microwave-assisted digested samples, such as described  
501 elsewhere [26]. Calcium, Cu, K, Mg, Na, P, S, Zn, and Fe were determined by inductively  
502 coupled plasma optical spectrometry (ICP OES, Vista Pro-CCD with a radial view, Varian,  
503 Mulgrave, Australia). Selenium was determined by inductively coupled plasma mass  
504 spectrometry (ICP-MS 820-MS, Varian, Mulgrave, Australia).

505 The estimation of the genetic breeding value (GEBVs) for all the minerals' amount  
506 was previously made [26] through a Bayesian model that considered birthplace, feedlot  
507 location and breeding season in the contemporary groups as fixed effects and age at slaughter  
508 as a linear covariate.

509

## 510 **mRNA-Seq and miRNA-Seq sequencing and quality control**

511

512 The total RNA extraction, quality control, and sequencing were described elsewhere  
513 [70]. In summary, total RNA from all the 113 samples was extracted using Trizol<sup>®</sup> (Life  
514 Technologies, Carlsbad, CA) and its integrity was evaluated in a Bioanalyzer 2100<sup>®</sup> (Agilent,

515 Santa Clara, CA, USA). Regarding the mRNA-Seq data, the library preparation was made  
516 with the TruSeq<sup>®</sup> sample preparation kit, and the paired-end sequencing [10] was made in an  
517 Illumina HiSeq 2500<sup>®</sup>. For the miRNA-Seq data, the library preparation was made with  
518 TruSeq<sup>®</sup> small RNA sample preparation kit, and the single-end sequencing [70] was made in  
519 a MiSeq sequencer.

520 As a quality control for the sequences, we filtered out reads with less than 65 bp and  
521 Phred Score less than 24 for the mRNA-Seq data, and the removal of reads with less than 18  
522 bp and Phred Score less than 28 of the miRNA-Seq data were made using the Seqclean  
523 software (<http://sourceforge.net/projects/seqclean/files/>).

524 The reads that passed the quality control were aligned to the reference bovine genome  
525 ARS-UCD 1.2 with the STAR v.2.5.4 software [72] for the mRNA-Seq data and with the  
526 mirDeep2 software [73] for the miRNA-Seq. The same software was used to the  
527 identification and quantification of transcripts and miRNAs, respectively, in raw counts.

528

### 529 **Filtering, normalization and batch effect correction**

530

531 After quality control, the mRNA-Seq and miRNA-Seq expression data were filtered  
532 separately to remove the transcripts and miRNA not expressed in at least 22 samples, or  
533 approximately 20% of the samples.

534 A first component analysis was performed for the mRNA-Seq expression data, with  
535 the NOISEq v.2.16.0 software [74] to visually verify the batch effect of the birthplace, feedlot  
536 location, breeding season, age at slaughter, slaughter group and a combination of sequencing  
537 flowcell and lane over the expression data. The data were normalized using the VST function  
538 from DESeq2 software [75], and the batch effect correction for the combination of  
539 sequencing flowcell and lane was made using the ARSyNseq function from the NOISEq  
540 v.2.16.0 software [74]. For the miRNA-Seq expression data, the procedure was the same,  
541 with the batch effect test only for the sequencing lane.

542

### 543 **PCIT (Partial Correlation Coefficient with Information Theory) with mRNA, miRNA** 544 **and phenotypes**

545

546 A new application of the PCIT algorithm [15] was developed to test the correlation  
547 between the expression values of genes and miRNAs that passed the quality control filters  
548 and the GEBVs for ten minerals.



549 The original application of the algorithm is used to test the co-expression between  
550 genes by correlation analysis between expression values [15]. In our application, we included  
551 the GEBVs for each one of the ten minerals evaluated here for each sample in the algorithm  
552 input with the gene and miRNA expression values (called PCIT general). Using this  
553 approach, we estimated the correlations among all the elements. Among the significant  
554 correlations, we selected only the genes and miRNAs with expression values correlated to the  
555 GEBV of at least one mineral. Due to the low number of miRNAs identified compared to the  
556 high number of genes, we did one more PCIT analysis only with miRNAs expression values  
557 and the GEBVs (called PCIT miRNA). The results from these two PCITs analysis were  
558 combined. In the end we had a list of elements (genes and miRNAs) with expression values  
559 correlated to each mineral GEBV.

560

### 561 **RIF (regulatory impact factor)**

562

563 A new application of the RIF algorithm [16] was applied to obtain the predict  
564 regulatory impact of the genes and miRNAs with expression values associated with a given  
565 mineral on the amount of the same mineral, considering its GEBVs. The original application  
566 of the algorithm was developed to determine the regulatory impact of TFs over selected genes  
567 (targets) related to a given trait through their expression values analysis between contrasting  
568 groups for the same trait [16]. In our approach, for each mineral, we used the genes and  
569 miRNAs with expression values correlated to a mineral, from the previous PCIT analyses, as  
570 elements to be tested as regulators and the mineral GEBV as the target.

571 We carried out 10 different analyses with the RIF algorithm [16], being one for each  
572 mineral. As input, we used the GEBVs for the 30 contrasting samples for each mineral as  
573 targets (15 representing samples with high mineral mass fraction and 15 with low mineral  
574 mass fraction) and the expression values for the genes and miRNAs correlated to the same  
575 mineral as elements to be tested. To select these contrasting groups we expanded the sample  
576 selection based on GEBVs previously made [9] [10]. Genes and miRNAs with RIF I or II  
577 results higher than  $|1.96|$  were considered as significant, as authors suggest [16].

578

### 579 **RIF for all minerals together**

580

581 To identify genes and miRNAs with significant impact factor in all minerals' mass  
582 fraction together, we used the new application for the RIF algorithm [16] using the GEBV

583 from 30 contrasting samples forming two groups regarding the amount of the ten minerals as  
584 targets and the expression values for the genes and miRNAs correlated to at least one mineral  
585 as elements to be tested.

586 To select contrasting samples for all the minerals together, we ranked our samples  
587 based on a score. To calculate this score for each sample, we performed a principal  
588 component analysis (PCA) using the GEBVs for ten minerals for the 113 samples. From the  
589 PC results, the score of each sample was calculated based on the following formula:

590

$$591 \quad A_i = \sum_{j=1}^{10} k \text{Contrib}_{ijk} \times Z_{ijk} \times \%V_{PCj}$$

592

593 Where:  $A_i$  = score for the animal  $i$ ,  $\sum_{j=1}^{10} k$  = sum of all minerals  $k$ , in all the PCs  $j$  and in all  
594 the animals  $i$ ,  $\text{Contrib}_{ijk}$  = contribution of the animal  $i$  in the PC  $j$  for the mineral  $k$ ,  $Z_{ijk}$  =  
595 standardized value (standard deviation one and mean zero) of the GEBV for the mineral  $k$  for  
596 the animal  $i$  in the PC  $j$  and  $\%V_{PCj}$  = eigenvalue of the PC  $j$ .

597 We performed a functional annotation analysis using DAVID 6.8 software [76] with  
598 the genes presenting significant RIFs for the score, representing all minerals together.

599

## 600 **Genes and miRNAs correlated to minerals**

601

602 Significant correlations obtained from PCIT [15] analysis between genes or miRNAs  
603 expressions and minerals were used to build a co-expression network with the Cytoscape  
604 software [77]. We overlapped the gene list from our network with the genes previously  
605 reported from our research group based on the same population evaluated here presenting  
606 differentially expressed to at least one mineral [9] [10], TFs [17], affected by cis or trans  
607 eQTLs [18] and with significant RIF. These features were used as attributes in the network.  
608 Regarding the differentially expressed genes (DEGs) for Fe [10], we called the genes more  
609 expressed in the high Fe content group as upregulated and the genes more expressed in the  
610 low Fe content group as downregulated, to match the nomination of the other minerals'  
611 DEGs [9]. Functional annotation analyses were made using DAVID 6.8 software [76].

612

613

614

## 615 **Integration with DEGs**

616

617 To estimate the relationship among the genes or miRNAs with expression values  
618 correlated with minerals and the DEGs between contrasting groups for mineral concentration  
619 previously detected [9], we made ten separately PCIT [15] analysis. In these analyses, the  
620 PCIT algorithm was used as proposed initially [15] to test the correlations among the genes  
621 and miRNAs with expression values correlated to each mineral, and the DEGs previously  
622 detected for the same mineral [9] [10].

623 The significant correlations identified in each analysis was used to obtain co-  
624 expression networks with the Cytoscape software [77]. The NetworkAnalyzer tool for the  
625 Cytoscape software [77] was used to obtain the connectivity degree of each gene and miRNA  
626 in the networks. This value was used to identify the hub genes/miRNAs from the average of  
627 the connectivity degree from the network summed with the double of the referent standard  
628 deviation.

629 We considered only the significant correlations containing at least a hub or significant  
630 RIF gene/miRNA for a given mineral. The genes present in these considered correlations  
631 were used to perform a functional annotation analysis with the STRING v.1.2.2 software  
632 [78]. From these analyses, we selected the genes being part of enriched pathways considering  
633 KEGG [79] and Reactome [19] databases with *Bos taurus* reference genome.

634

## 635 **Putative regulators of the genes being part of enriched pathways**

636

637 To identify the elements putatively regulating the genes being part of over-  
638 represented pathways for each mineral in the study, we did another round of PCIT [15]  
639 analyses, separately for each mineral. In this case, from each mineral last PCIT analysis, we  
640 selected as inputs the genes being part of enriched pathways, also considering the previously  
641 enriched pathways from differentially expressed genes related to mineral amount [9] [10], the  
642 hub elements, TFs [17], miRNAs and the ones with significant RIFs, with their respective  
643 attributes. The PCIT [15] results were used to obtain co-expression networks with Cytoscape  
644 [77] software.

645

646

647

648

649 **miRNA-gene targeting confirmation**

650

651 We used TargetScan software [80] to predict the target genes for the miRNAs with  
652 expression values correlated to a mineral in Figures 3 and 4 and we compared these putative  
653 targets with the genes with expression values correlated to them in our networks.

654

655 **References**

656

- 657 [1] Geesink GH, Koohmaraie M. Effect of Calpastatin on Degradation of Myofibrillar  
658 proteins by  $\mu$ -Calpain Under Postmortem Conditions. *J Anim Sci* 1999; 77:2685–92.
- 659 [2] Williams P. Nutritional composition of red meat. *Nutr Diet*. 2007;64:S113-19.
- 660 [3] Doyle JJ, Spaulding JE. Toxic and Essential Trace Elements in Meat - a Review. *J Anim*  
661 *Sci*. 1978;47(2):398–419.
- 662 [4] Campbell I. Macronutrients, minerals, vitamins and energy. *Anaesth Intensive Care Med*.  
663 2017;18(3):141–6.
- 664 [5] Ahola JK, Baker DS, Burns PD, Mortimer RG, Enns RM, Whittier JC et al. Effect of copper,  
665 zinc, and manganese supplementation and source on reproduction, mineral status, and  
666 performance in grazing beef cattle over a two-year period. *J. Anim. Sci*. 2004; 95:2357-2383.
- 667 [6] Genther ON, Hansen SL. Effect of dietary trace mineral supplementation and a multi-  
668 element trace mineral injection on shipping response and growth performance of beef cattle. *J*  
669 *Anim Sci*. 2014;92(6):2522–30.
- 670 [7] Enjalbert F, Lebreton P, Salat O. Effects of copper, zinc and selenium status on  
671 performance and health in commercial dairy and beef herds: Retrospective study. *J Anim*  
672 *Physiol Anim Nutr*. 2006;90(11–12):459–66.
- 673 [8] Mateescu RG, Garmyn AJ, Tait JG, Duan Q, Liu Q, Mayes MS, et al. Genetic parameters  
674 for concentrations of minerals in longissimus muscle and their associations with palatability  
675 traits in angus cattle. *J Anim Sci*. 2013;91(3):1067–75.
- 676 [9] Afonso J, Coutinho LL, Tizioto PC, Diniz WJS, De Lima AO, Rocha MIP et al. Muscle  
677 transcriptome analysis reveals genes and metabolic pathways related to mineral concentration  
678 in *Bos indicus*. *Sci Rep*. 2019;9:1-11.
- 679 [10] Diniz WJ, Coutinho LL, Tizioto PC, Cesar ASM, Gromboni CF, Nogueira ARA, et al.  
680 Iron content affects lipogenic gene expression in the muscle of Nelore beef cattle. *PLoS One*.  
681 2016;11(8):1–19.
- 682 [11] Hudson NJ, Dalrymple BP, Reverter A. Beyond differential expression: the quest for

- 683 causal mutations and effector molecules. *BMC Genomics*. 2012;13(1):1-16.
- 684 [12] Serin EAR, Nijveen H, Hilhorst HWM, Ligterink W. Learning from Co-expression  
685 Networks: Possibilities and Challenges. *Front Plant Sci*. 2016;7:1–18.
- 686 [13] Diniz WJS, Mazzoni G, Coutinho LL, Banerjee P, Geistlinger L, Cesar ASM, et al.  
687 Detection of Co-expressed Pathway Modules Associated With Mineral Concentration and  
688 Meat Quality in Nelore Cattle. *Front Genet*. 2019;10:1–12.
- 689 [14] Langfelder P, Horvath S. WGCNA: an R package for weighted correlation network  
690 analysis. *BMC Bioinformatics*. 2008;9:1-13.
- 691 [15] Reverter A, Chan EKF. Combining partial correlation and an information theory  
692 approach to the reversed engineering of gene co-expression networks. *Bioinformatics*.  
693 2008;24(21):2491–7.
- 694 [16] Reverter A, Hudson NJ, Nagaraj SH, Pérez-Enciso M, Dalrymple BP. Regulatory impact  
695 factors: Unraveling the transcriptional regulation of complex traits from expression data.  
696 *Bioinformatics*. 2010;26(7):896–904.
- 697 [17] de Souza MM, Zerlotini A, Geistlinger L, Tizioto PC, Taylor JF, Rocha MIP, et al. A  
698 comprehensive manually-curated compendium of bovine transcription factors. *Sci Rep* .  
699 2018;8(1):1–12.
- 700 [18] Cesar ASM, Regitano LCA, Reecy JM, Poleti MD, Oliveira PSN, de Oliveira GB, et al.  
701 Identification of putative regulatory regions and transcription factors associated with  
702 intramuscular fat content traits. *BMC Genomics*. 2018;19(1):1–20.
- 703 [19] Fabregat A, Jupe S, Matthews L, Sidiropoulos K, Gillespie M, Garapati P, et al. The  
704 Reactome Pathway Knowledgebase. *Nucleic Acids Res*. 2018;46:D649–55.
- 705 [20] Salazar G, Huang J, Feresin RG, Zhao Y, Griendling KK. Zinc regulates Nox1  
706 expression through a NF- $\kappa$ B and mitochondrial ROS dependent mechanism to induce  
707 senescence of vascular smooth muscle cells. *Free Radic Biol Med*. 2017;108:225–35.
- 708 [21] Brigelius-Flohé R, Kipp AP. Selenium in the redox regulation of the Nrf2 and the Wnt  
709 pathway. *Methods Enzymol*. 2013;527:65–86.
- 710 [22] Maltzahn JV, Chang NC, Bentzinger CF, Rudnicki MA. Wnt signaling in myogenesis.  
711 *Trends in Cell Biol*. 2012; 22:602-9.
- 712 [23] Park SH, Ryu SH, Suh PG, Kim H. Assignment of human PLCB2 encoding PLC  $\beta$ 2 to  
713 human chromosome 15q15 by fluorescence in situ hybridization. *Cytogenet Genome Res*.  
714 1998;83(1–2):48–9.
- 715 [24] Seidman SA, Johnson NA, Arbelo U, Aribindi K, Bhattacharya SK. Tissue protein and  
716 lipid alterations in response to metallic impaction. *J Cell Biochem*. 2019;120(2):2347–61.

- 717 [25] Behera R, Kothekar MD, Kale DS, Krishnamurthi K, Sirothia AR, Kalorey DR, et al.  
718 Study of mutations in aminolevulinic acid dehydratase (ALAD) gene in cattle from fly ash  
719 zone in Maharashtra, India. *Indian J Anim Res.* 2016;50(1):19–22.
- 720 [26] Tizioto PC, Taylor JF, Decker JE, Gromboni CF, Mudadu MA, Schnabel RD, et al.  
721 Detection of quantitative trait loci for mineral content of Nelore *longissimus dorsi* muscle.  
722 *Genet Sel Evol.* 2015;47(1):1–9.
- 723 [27] Itkin M, Heinig U, Tzfadia O, Bhide AJ, Shinde B, Cardenas PD, et al. Biosynthesis of  
724 antinutritional alkaloids in solanaceous crops is mediated by clustered genes. *Science.*  
725 2013;341:175–9.
- 726 [28] Lanier LL, O’Fallon S, Somoza C, Phillips JH, Linsley PS, Okumura K, et al. CD80  
727 (B7) and CD86 (B70) provide similar costimulatory signals for T cell proliferation, cytokine  
728 production, and generation of CTL. *J Immunol.* 1995;154(1):97–105.
- 729 [29] Lozanoska-Ochser B, Klein NJ, Huang GC, Alvarez RA, Peakman M. Expression of  
730 CD86 on Human Islet Endothelial Cells Facilitates T Cell Adhesion and Migration. *J*  
731 *Immunol.* 2008;181(9):6109–16.
- 732 [30] George AB, Kanellopoulou C, Masutani E, Chaigne-delalande B, Michael J. ITK is a  
733 magnesium sensor during T cell activation. *J Immunol.* 2017;198:1-10.
- 734 [31] Chandy KG, Wulff H, Beeton C, Pennington M, Gutman GA, Cahalan MD. K+  
735 channels as targets for specific immunomodulation. *Trends Pharmacol Sci.* 2004;25(5):280–  
736 9.
- 737 [32] Gavile CM, Barwick BG, Newman S, Neri P, Nooka AK, Lonial S, et al. CD86  
738 regulates myeloma cell survival. *Blood Adv.* 2017;1(25):2307–19.
- 739 [33] Ferrari S, Bonjour JP, Rizzoli R. The vitamin D receptor gene and calcium metabolism.  
740 *Trends Endocrinol Metab.* 1998;9(7):259–65.
- 741 [34] Uwitonze AM, Razzaque MS. Role of Magnesium in Vitamin D Activation and  
742 Function. *J Am Osteopath Assoc.* 2018;118(3):181-89.
- 743 [35] Harrington M, Bennett T, Jakobsen J, Ovesen L, Brot C, Flynn A, et al. The effect of a  
744 high-protein , high-sodium diet on calcium and bone metabolism in postmenopausal women  
745 and its interaction with vitamin D receptor genotype. *Br J Nutr.* 2004;25:41–51.
- 746 [36] Marcellini S, Bruna C, Henríquez JP, Albistur M, Reyes AE, Barriga EH, et al.  
747 Evolution of the interaction between Runx2 and VDR, two transcription factors involved in  
748 osteoblastogenesis. *BMC Evol Biol.* 2010;10(1):1–12.
- 749 [37] Mayr T, Deutsch U, Köhl M, Drexler HCA, Lottspeich F, Deutzmann R, et al. Fritz: A  
750 secreted frizzled-related protein that inhibits Wnt activity. *Mech Dev.* 1997;63(1):109–25.

- 751 [38] Yao L, Sun YT, Sun W, Xu TH, Ren C, Fan X, et al. High phosphorus level leads to  
752 aortic calcification via  $\beta$ -catenin in chronic kidney disease. *Am J Nephrol.* 2015;41(1):28–36.
- 753 [39] Du J, Zu Y, Li J, Du S, Xu Y, Zhang L, et al. Extracellular matrix stiffness dictates Wnt  
754 expression through integrin pathway. *Sci Rep.* 2016;6:1–12.
- 755 [40] Larriba MJ, González-Sancho JM, Barbáchano A, Niell N, Ferrer-Mayorga G, Muñoz A.  
756 Vitamin D is a multilevel repressor of Wnt/ $\beta$ -catenin signaling in cancer cells. *Cancers.*  
757 2013;5(4):1242–60.
- 758 [41] Guo S, Zhang W, Weia C, Wang L, Zhu G, Shi Q, et al. Serum and skin levels of miR-  
759 369-3p in patients with psoriasis and their correlation with disease severity. *Eur J*  
760 *Dermatology.* 2013;23(5):608–13.
- 761 [42] Regenhard P, Leippe M, Schubert S, Podschun R, Kalm E, Grötzinger J, et al.  
762 Antimicrobial activity of bovine psoriasin. *Vet Microbiol.* 2009;136:335–40.
- 763 [43] Lowes MA, Bowcock AM, Krueger JG. Pathogenesis and therapy of psoriasis. *Nature.*  
764 2007;445:866–73.
- 765 [44] Cubillos S, Norgauer J. Low Vitamin D-modulated calcium-regulating proteins in  
766 psoriasis vulgaris plaques: S100A7 overexpression depends on joint involvement. *Int J Mol*  
767 *Med.* 2016;38(4):1083–92.
- 768 [45] Kazandjieva J, Grozdev I, Darlenski R, Tsankov N. Climatotherapy of psoriasis. *Clin*  
769 *Dermatol.* 2008;26(5):477–85.
- 770 [46] Senni K, Foucault-Bertaud A, Godeau G. Magnesium and connective tissue. *Magnes*  
771 *Res.* 2003;16(1):70–4.
- 772 [47] Jabłońska-Trypuć A, Matejczyk M, Rosochacki S. Matrix metalloproteinases (MMPs),  
773 the main extracellular matrix (ECM) enzymes in collagen degradation, as a target for  
774 anticancer drugs. *J Enzyme Inhib Med Chem.* 2016;31:177–83.
- 775 [48] Yamamoto Y, Irie K, Kurihara H, Sakai T, Takai Y. Vmac: A novel protein associated  
776 with vimentin-type intermediate filament in podocytes of rat kidney. *Biochem Biophys Res*  
777 *Commun.* 2004;315(4):1120–5.
- 778 [49] Geiger B, Bershadsky A, Pankov R, Yamada KM, Correspondence BG. Transmembrane  
779 Extracellular Matrix-Cytoskeleton. *Nat Rev Mol Cell Biol.* 2001;2:793-805.
- 780 [50] Graña X, Reddy EP. Cell cycle control in mammalian cells: role of cyclins, cyclin  
781 dependent kinases (CDKs), growth suppressor genes and cyclin-dependent kinase inhibitors  
782 (CKIs). *Oncogene.* 1995;11(2):211–9.
- 783 [51] Moreno-Layseca P, Streuli CH. Signalling pathways linking integrins with cell cycle  
784 progression. *Matrix Biol.* 2014;34:144–53.

- 785 [52] Chauhan S, Titus DE, O'Brian MR. Metals control activity and expression of the heme  
786 biosynthesis enzyme  $\delta$ -aminolevulinic acid dehydratase in *Bradyrhizobium japonicum*. *J*  
787 *Bacteriol.* 1997;179(17):5516–20.
- 788 [53] Bardag-Gorce F, French SW. Delta-aminolevulinic dehydratase is a proteasome  
789 interacting protein. *Exp Mol Pathol.* 2011;91(2):485–9.
- 790 [54] Kammerl IE, Meiners S. Proteasome function shapes innate and adaptive immune  
791 responses. *Am J Physiol - Lung Cell Mol Physiol.* 2016; 311:L328-36.
- 792 [55] Kamitani-Kawamoto A, Hamada M, Moriguchi T, Miyai M, Saji F, Hatamura I, et al.  
793 MafB interacts with Gcm2 and regulates parathyroid hormone expression and parathyroid  
794 development. *J Bone Miner Res.* 2011;26(10):2463–72.
- 795 [56] Delgado M, Tesfaigzi Y. Is BMF central for anoikis and autophagy? *Autophagy.*  
796 2014;10:1–2.
- 797 [57] Cunnane C. Differential regulation of essential fatty acid metabolism to the  
798 prostaglandins: possible basis for the interaction of zinc and copper in biological systems.  
799 *Prog Lipid Res.* 1982;21:73–90.
- 800 [58] Tamanoi F, Hsueh EC, Goodman LE, Cobitz AR, Detrick RJ, Brown WR, et al.  
801 Posttranslational modification of ras proteins: Detection of a modification prior to fatty acid  
802 acylation and cloning of a gene responsible for the modification. *J Cell Biochem.*  
803 1988;36(3):261–73.
- 804 [59] Grimble RF. The effects of sulfur amino acid intake on immune function in humans. *J*  
805 *Nutr.* 2006;136:1660S-1665S.
- 806 [60] Chen C-Y, Jan Y-H, Juan Y-H, Yang C-J, Huang M-S, Yu C-J, et al. Fucosyltransferase  
807 8 as a functional regulator of nonsmall cell lung cancer. *Proc Natl Acad Sci.*  
808 2013;110(2):630–5.
- 809 [61] Macaluso M, Russo G, Cinti C, Bazan V, Gebbia N, Russo A. Ras family genes: An  
810 interesting link between cell cycle and cancer. *J Cell Physiol.* 2002;192(2):125–30.
- 811 [62] Whiteside TL. Immune responses to malignancies. *J Allergy Clin Immunol.*  
812 2010;125:S272-S283.
- 813 [63] Cranenburg ECM, Schurgers LJ, Vermeer C. Vitamin K: The coagulation vitamin that  
814 became omnipotent. *J Thromb Haemostasis.* 2017;98:145–61.
- 815 [64] Delvaeye M, Conway EM. Coagulation and innate immune responses: Can we view  
816 them separately? *Blood.* 2009;114(12):2367–74.
- 817 [65] Huang J, Hsu YH, Mo C, Abreu E, Kiel DP, Bonewald F et al. METTL21C is a potential  
818 pleiotropic gene for osteoporosis and sarcopenia acting through the modulation of the NF $\kappa$ B



- 819 signaling pathway. *J Bone Miner Res.* 2014;29(7):1531–40.
- 820 [66] Billah MM. Phospholipase D and cell signaling. *Curr Opin Immunol.* 1993;5(1):114–23.
- 821 [67] Drolet DW, Scully KM, Simmons DM, Wegner M, Chu KT, Swanson LW, Rosenfeld  
822 MG. TEF, a transcription factor expressed specifically in the anterior pituitary during  
823 embryogenesis, defines a new class of leucine zipper proteins. *Genes and Develo.*  
824 2009;5:1739–53.
- 825 [68] Noordeen NA, Carafoli F, Hohenester E, Horton MA, Leitinger B. A transmembrane  
826 leucine zipper is required for activation of the dimeric receptor tyrosine kinase DDR1. *J Biol*  
827 *Chem.* 2006;281(32):22744–51.
- 828 [69] Sullivan WJ, Mullen PJ, Schmid EW, Flores A, Momcilovic M, Sharpley MS, et al.  
829 Extracellular Matrix Remodeling Regulates Glucose Metabolism through TXNIP  
830 Destabilization. *Cell.* 2018;175(1):117-132
- 831 [70] Oliveira GB, Regitano LCA, Cesar ASM, Reecy JM, Degaki KY, Poleti MD et al.  
832 Integrative analysis of microRNAs and mRNAs revealed regulation of composition and  
833 metabolism in Nelore cattle. *BMC Genomics.* 2018;19(1):1–16.
- 834 [71] de Oliveira PSN, Cesar ASM, do Nascimento ML, Chaves AS, Tizioto PC, Tullio RR, et  
835 al. Identification of genomic regions associated with feed efficiency in Nelore cattle. *BMC*  
836 *Genet.* 2014;15:10.
- 837 [72] Dobin A, Davis CA, Schlesinger F, Drenkow J, Zaleski C, Jha S, et al. STAR: Ultrafast  
838 universal RNA-seq aligner. *Bioinformatics.* 2013;29(1):15–21.
- 839 [73] Friedländer MR, MacKowiak SD, Li N, Chen W, Rajewsky N. MiRDeep2 accurately  
840 identifies known and hundreds of novel microRNA genes in seven animal clades. *Nucleic*  
841 *Acids Res.* 2012;40(1):37–52.
- 842 [74] Tarazona S, Furió-Tarí P, Turrà D, Di Pietro A, Nueda MJ, Ferrer A, et al. Data quality  
843 aware analysis of differential expression in RNA-seq with NOISeq R/Bioc package. *Nucleic*  
844 *Acids Res.* 2015;43(21):15.
- 845 [75] Love MI, Huber W, Anders S. Moderated estimation of fold change and dispersion for  
846 RNA-seq data with DESeq2. *Genome Biol.* 2014;15(12):15.
- 847 [76] Huang DW, Sherman BT, Lempicki RA. Systematic and integrative analysis of large  
848 gene lists using DAVID bioinformatics resources. *Nat Protoc.* 2009;4(1):44–57.
- 849 [77] Shannon P, Markiel A, Ozier O, Baliga NS, Wang JT, Ramage D et al. Cytoscape: a  
850 software environment for integrated models of biomolecular interaction networks. *Genome*  
851 *Res.* 2003;13:2498–504.
- 852 [78] Pertea M, Pertea GM, Antonescu CM, Chang TC, Mendell JT, Salzberg SL. StringTie

853 enables improved reconstruction of a transcriptome from RNA-seq reads. *Nat Biotechnol.*  
854 2015;33(3):290–5.

855 [79] Kanehisa M, Furumichi M, Tanabe M, Sato Y, Morishima K. KEGG: New perspectives  
856 on genomes, pathways, diseases and drugs. *Nucleic Acids Res.* 2017;45:D353–61.

857 [80] Agarwal V, Bell GW, Nam J-W, Bartel DP. Predicting effective microRNA target sites  
858 in mammalian mRNAs. *Elife.* 2015;4:1–38.

## 859 **Acknowledgements**

861  
862 We thank FAPESP (2012/23638-8) for financing the projects encompassing this one  
863 and Capes for the scholarship for the first author. We thank all the Staff of Embrapa Pecuária  
864 Sudeste responsible for monitoring and taking care of animals. We thank CNPq for the  
865 productivity scholarship for the ninth, tenth and last authors. We also thank The University of  
866 Queensland for receiving the first author in a Ph.D. internship and the Commonwealth  
867 Scientific and Industrial Research Organisation (CSIRO) for assistance during the same  
868 internship.

## 869 **Authors Contribution**

870  
871  
872 J.A., M.R.S.F., A.R and L.C.A.R. designed the experiments and analysis. J.A.,  
873 M.R.S.F., A.R., W.J.S.D., A.S.M.C, A.O.L., J.P., M.M.S., L.L.C., G.B.M., A.Z., C.F.G.,  
874 A.R.A.N., performed the experiments and analysis. J.A., M.R.S.F., A.R. and L.C.A.R.  
875 interpreted the results. J.A. and M.R.S.F. drafted the manuscript. All authors revised and  
876 approved the final manuscript.

## 877 **Competing Interests**

878  
879  
880 The authors claim no competing interests.

881  
882  
883  
884  
885  
886

887 **Table 1. Number of genes and miRNAs with expression values correlated to each**  
888 **mineral considering both PCIT analysis.** PCIT general, with mineral genomic estimates of  
889 breeding values, genes and miRNAs expression and PCIT miRNA with mineral GEBVs and  
890 miRNAs expression. The data came from *Longissimus thoracis* muscle from Nelore steers  
891 and the genes and miRNA expressions were identified based on RNA-Seq analysis.  
892

| <b>Mineral</b> | <b>Gene</b> | <b>miRNA</b> | <b>Repeated miRNA<sup>a</sup></b> |
|----------------|-------------|--------------|-----------------------------------|
| <b>Ca</b>      | 22          | 6            | 0                                 |
| <b>Cu</b>      | 35          | 5            | 0                                 |
| <b>K</b>       | 33          | 5            | 0                                 |
| <b>Mg</b>      | 37          | 8            | 0                                 |
| <b>Na</b>      | 42          | 6            | 3                                 |
| <b>P</b>       | 19          | 6            | 0                                 |
| <b>S</b>       | 55          | 6            | 1                                 |
| <b>Se</b>      | 32          | 6            | 2                                 |
| <b>Zn</b>      | 36          | 9            | 0                                 |
| <b>Fe</b>      | 27          | 5            | 1                                 |

893 <sup>a</sup> number of miRNAs with expression values correlated to a mineral in both PCIT analysis  
894 (PCIT general and PCIT miRNA)

895

896

897 **Table 2. Number of genes and miRNAs with a significant regulatory impact factor over**  
898 **the genomic estimates of breeding values for each mineral and all minerals together**  
899 **(PCA score).** The data came from *Longissimus thoracis* muscle from Nelore steers and the  
900 genes and miRNA expressions were identified based on RNA-Seq analysis.

901

| <b>Mineral</b>   | <b>Gene</b> | <b>miRNA</b> |
|------------------|-------------|--------------|
| <b>Ca</b>        | 1           | 1            |
| <b>Cu</b>        | 4           | 0            |
| <b>K</b>         | 3           | 1            |
| <b>Mg</b>        | 3           | 1            |
| <b>Na</b>        | 6           | 1            |
| <b>P</b>         | 1           | 0            |
| <b>S</b>         | 5           | 2            |
| <b>Se</b>        | 7           | 0            |
| <b>Zn</b>        | 4           | 2            |
| <b>Fe</b>        | 0           | 2            |
| <b>PCA Score</b> | 22          | 2            |

902

**Table 3. Number of genes and miRNAs with expression values correlated per mineral and per attribute considering both PCIT analysis.** PCIT general, with mineral genomic estimates of breeding values, genes and miRNAs expression and PCIT miRNA with mineral GEBVs and miRNAs expression. The data came from *Longissimus thoracis* muscle from Nelore steers and the genes and miRNA expressions were identified based on RNA-Seq analysis. Attributes: a) differentially expressed genes [9] [10], b) genes and miRNAs with significant regulatory impact factor, c) transcription factors [17], d) genes affected by cis eQTLs [18], e) genes affected by trans eQTLs [18], f) miRNAs and g) genes and miRNAs with expression values correlated to each mineral that were not identified in previous works.

| <b>Minerals</b> | <b>DEGs<sup>a</sup></b> | <b>Significant RIF<sup>b</sup></b> | <b>TFs<sup>c</sup></b> | <b>cis eQTLs<sup>d</sup></b> | <b>trans eQTLs<sup>e</sup></b> | <b>miRNAs<sup>f</sup></b> | <b>No attributes<sup>g</sup></b> |
|-----------------|-------------------------|------------------------------------|------------------------|------------------------------|--------------------------------|---------------------------|----------------------------------|
| <b>Ca</b>       | 0                       | 3                                  | 2                      | 0                            | 3                              | 5                         | 14                               |
| <b>Cu</b>       | 1                       | 4                                  | 1                      | 0                            | 1                              | 5                         | 28                               |
| <b>K</b>        | 2                       | 5                                  | 2                      | 0                            | 7                              | 3                         | 19                               |
| <b>Mg</b>       | 2                       | 6                                  | 2                      | 0                            | 5                              | 6                         | 23                               |
| <b>Na</b>       | 3                       | 7                                  | 2                      | 0                            | 13                             | 6                         | 21                               |
| <b>P</b>        | 0                       | 1                                  | 2                      | 0                            | 3                              | 6                         | 12                               |
| <b>S</b>        | 1                       | 8                                  | 3                      | 0                            | 8                              | 6                         | 34                               |
| <b>Se</b>       | 1                       | 9                                  | 2                      | 1                            | 3                              | 6                         | 17                               |
| <b>Zn</b>       | 0                       | 6                                  | 1                      | 0                            | 3                              | 9                         | 27                               |
| <b>Fe</b>       | 3                       | 19                                 | 0                      | 0                            | 2                              | 5                         | 9                                |

**Table 4. Pathways enriched for each mineral considering the gene expressions correlated to each one of them and the previously detected differentially expressed genes related to the same minerals in the same Nelore population.** Pathways just enriched in previous works with a differential expression approach and the same Nelore population are marked in dark grey, pathways enriched in our correlated genes expressions are marked in black and the pathways enriched in both in previous work and in the correlated genes expressions are marked in light grey. There were no enriched pathways for Zn.

|                                                              | Ca        | Cu        | K         | Mg        | Na        | P         | S     | Se        | Fe        |
|--------------------------------------------------------------|-----------|-----------|-----------|-----------|-----------|-----------|-------|-----------|-----------|
| AMPK signaling pathway                                       |           | Dark Grey |           |           |           |           |       |           | Dark Grey |
| Antigen processing and presentation                          |           |           |           |           |           |           |       |           | Dark Grey |
| Assembly of collagen fibrils and other multimeric structures |           | Dark Grey |           |           | Black     |           |       |           |           |
| Biosynthesis of unsaturated fatty acids                      |           | Dark Grey |           |           |           |           |       |           |           |
| Collagen biosynthesis and modifying enzymes                  | Black     | Black     |           |           |           |           |       |           |           |
| Collagen chain trimerization                                 | Black     | Black     |           | Black     | Black     |           |       |           |           |
| Collagen formation                                           |           |           |           |           | Black     |           |       |           |           |
| DAP12 interactions                                           |           |           |           |           |           |           | Black |           |           |
| Degradation of the ECM                                       | Black     |           |           |           |           |           |       |           |           |
| ECM organization                                             | Black     | Black     | Black     | Black     | Black     | Black     |       |           |           |
| ECM-receptor interaction                                     | Dark Grey | Dark Grey | Dark Grey | Dark Grey | Dark Grey | Dark Grey |       | Dark Grey |           |
| Fatty acid biosynthesis                                      |           | Dark Grey |           |           |           |           |       |           |           |
| Fatty acid metabolism                                        |           | Dark Grey |           |           |           |           |       |           |           |
| Fc gamma receptor (FCGR) dependent phagocytosis              |           |           |           |           |           |           | Black |           |           |
| Focal adhesion                                               |           | Dark Grey | Dark Grey | Dark Grey | Dark Grey | Dark Grey |       |           |           |
| G alpha (q) signaling events                                 |           |           |           |           |           |           | Black |           |           |
| Herpes simplex infection                                     |           |           |           |           |           |           |       |           | Dark Grey |
| Immune system                                                |           |           |           |           |           |           | Black |           | Dark Grey |
| Influenza A                                                  |           |           |           |           |           |           |       |           | Dark Grey |
| Innate immune system                                         |           |           |           |           |           |           | Black |           |           |
| Integrin cell surface interaction                            | Black     | Black     |           |           | Black     |           |       |           | Dark Grey |
| Measles                                                      |           |           |           |           |           |           |       |           | Dark Grey |
| Neutrophil degranulation                                     |           |           |           |           |           |           | Black |           |           |
| Non-integrin membrane-ECM interactions                       | Black     |           |           |           |           |           |       |           |           |
| O-glycosylation of TSR domain-containing proteins            | Black     |           |           |           |           |           |       |           |           |
| Phagosome                                                    |           |           | Dark Grey |           |           |           |       |           |           |
| PI3K-Akt signaling pathway                                   |           | Dark Grey | Dark Grey | Dark Grey | Dark Grey | Dark Grey |       |           |           |
| Platelet activation                                          |           | Dark Grey |           |           |           |           |       |           |           |
| PPAR signaling pathway                                       |           | Dark Grey |           |           |           |           |       |           | Dark Grey |
| Prion disease                                                | Dark Grey | Dark Grey |           |           |           |           |       |           |           |
| Protein digestion and absorption                             | Dark Grey | Dark Grey |           | Dark Grey | Dark Grey | Dark Grey |       | Dark Grey |           |
| Signal transduction                                          |           |           |           |           |           |           | Black |           |           |

912  
913  
914  
915  
916  
917  
918  
919

**Figure 1. Co-expression network among genes and miRNAs with expression values correlated to at least one mineral.** A) Complete network, B) Details about the correlations regarding the genes and miRNAs with expression values correlated to more than one mineral, the internal circle of the complete network, C) Correlations among the mineral's GEBVs.

A)

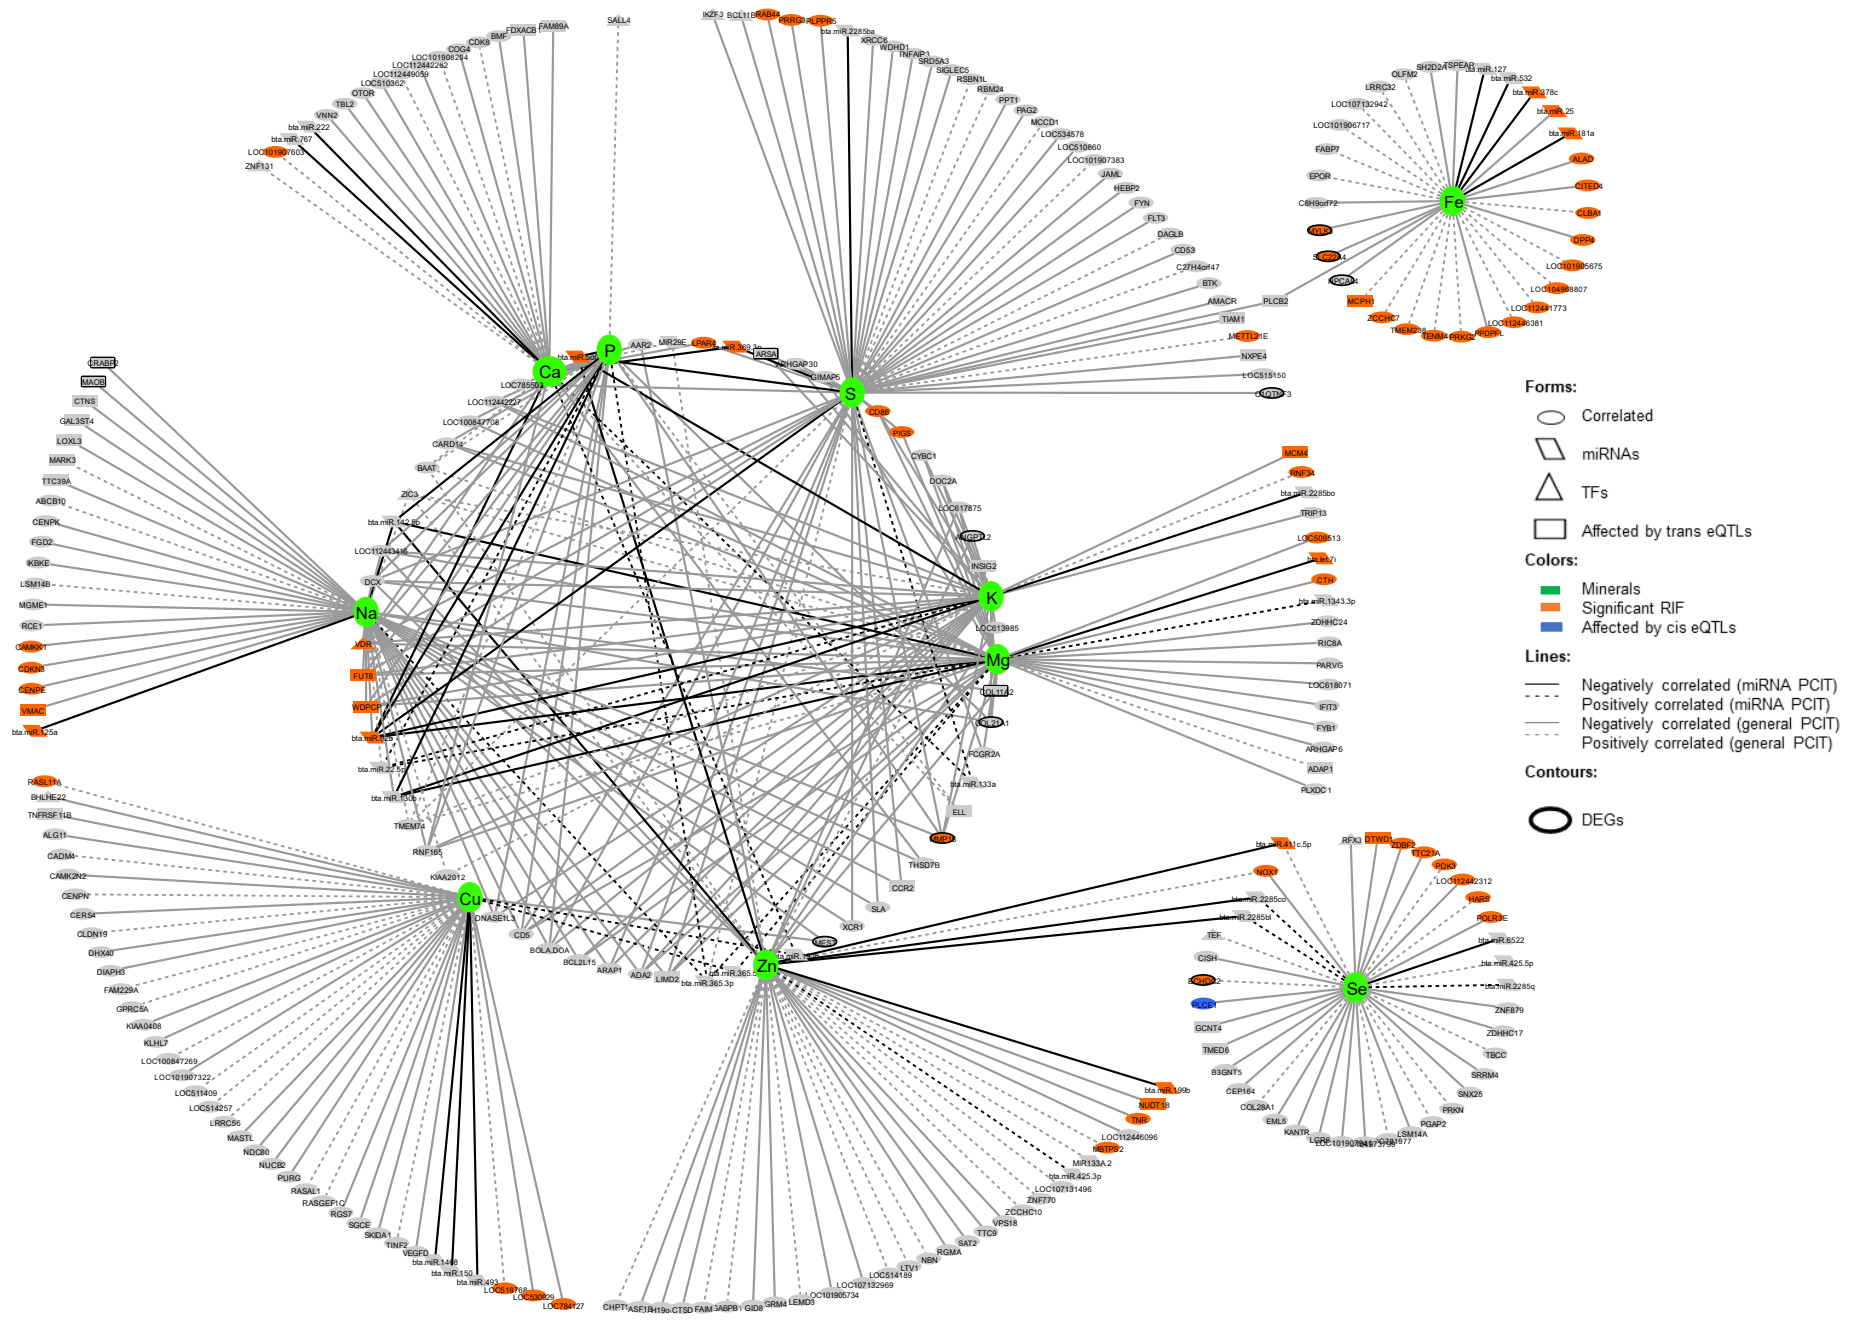

921 B)

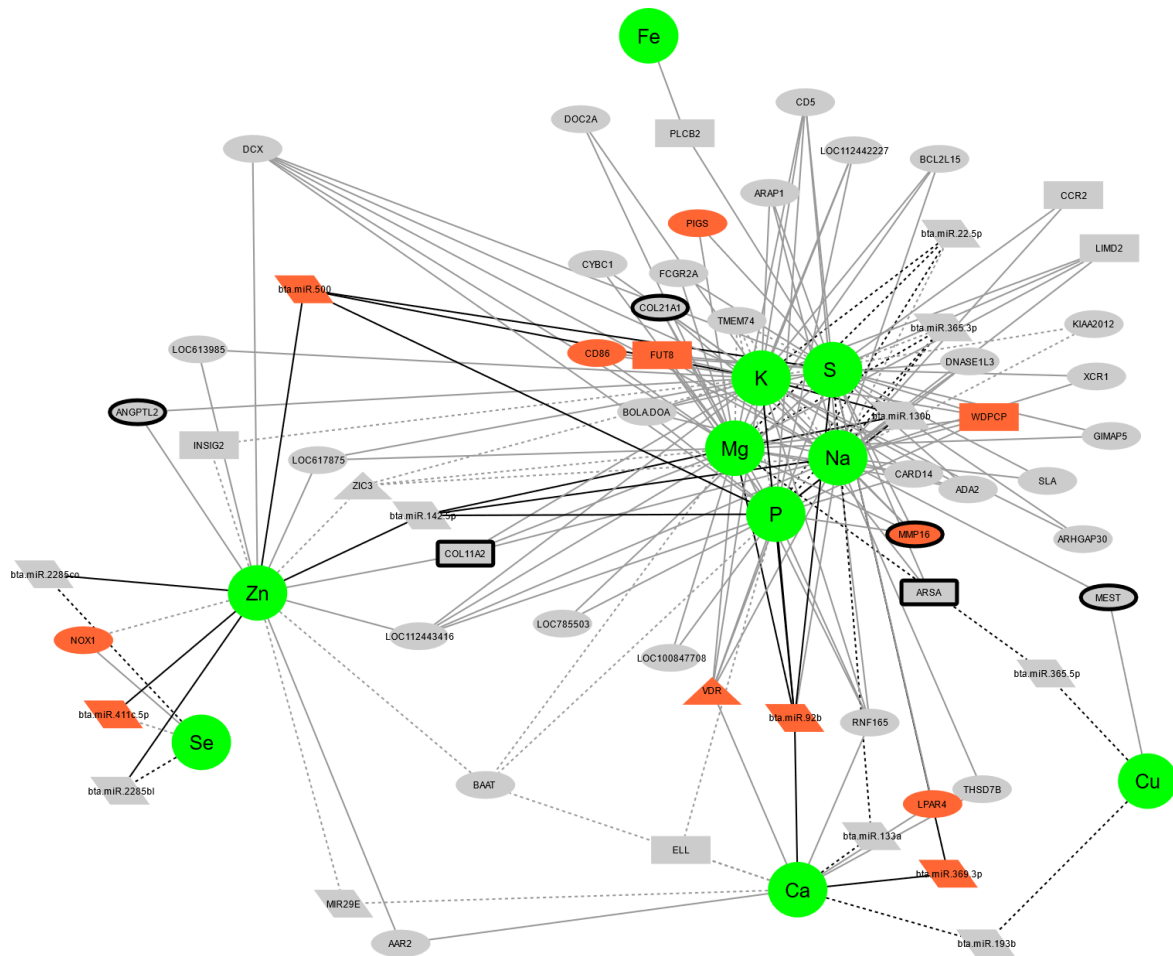

922 C)  
923

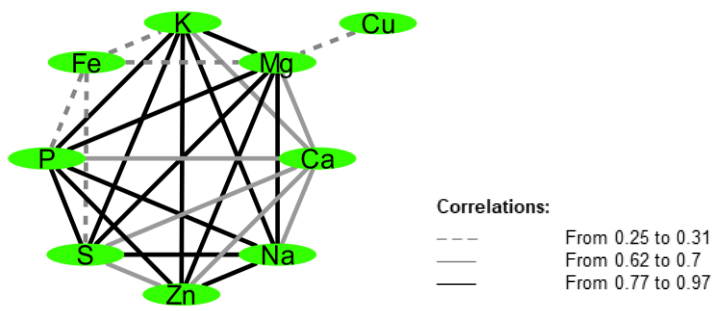

924  
925  
926  
927  
928  
929  
930  
931  
932  
933  
934  
935

936 **Figure 2. Representation of the contrasting samples considering the genomic estimated**  
937 **breeding values of all 10 minerals together, based on the PCA score.** Orange circles  
938 represent the samples with the highest scores (positive contrast) and the green circles  
939 represent the samples with the lowest scores (negative contrast).  
940

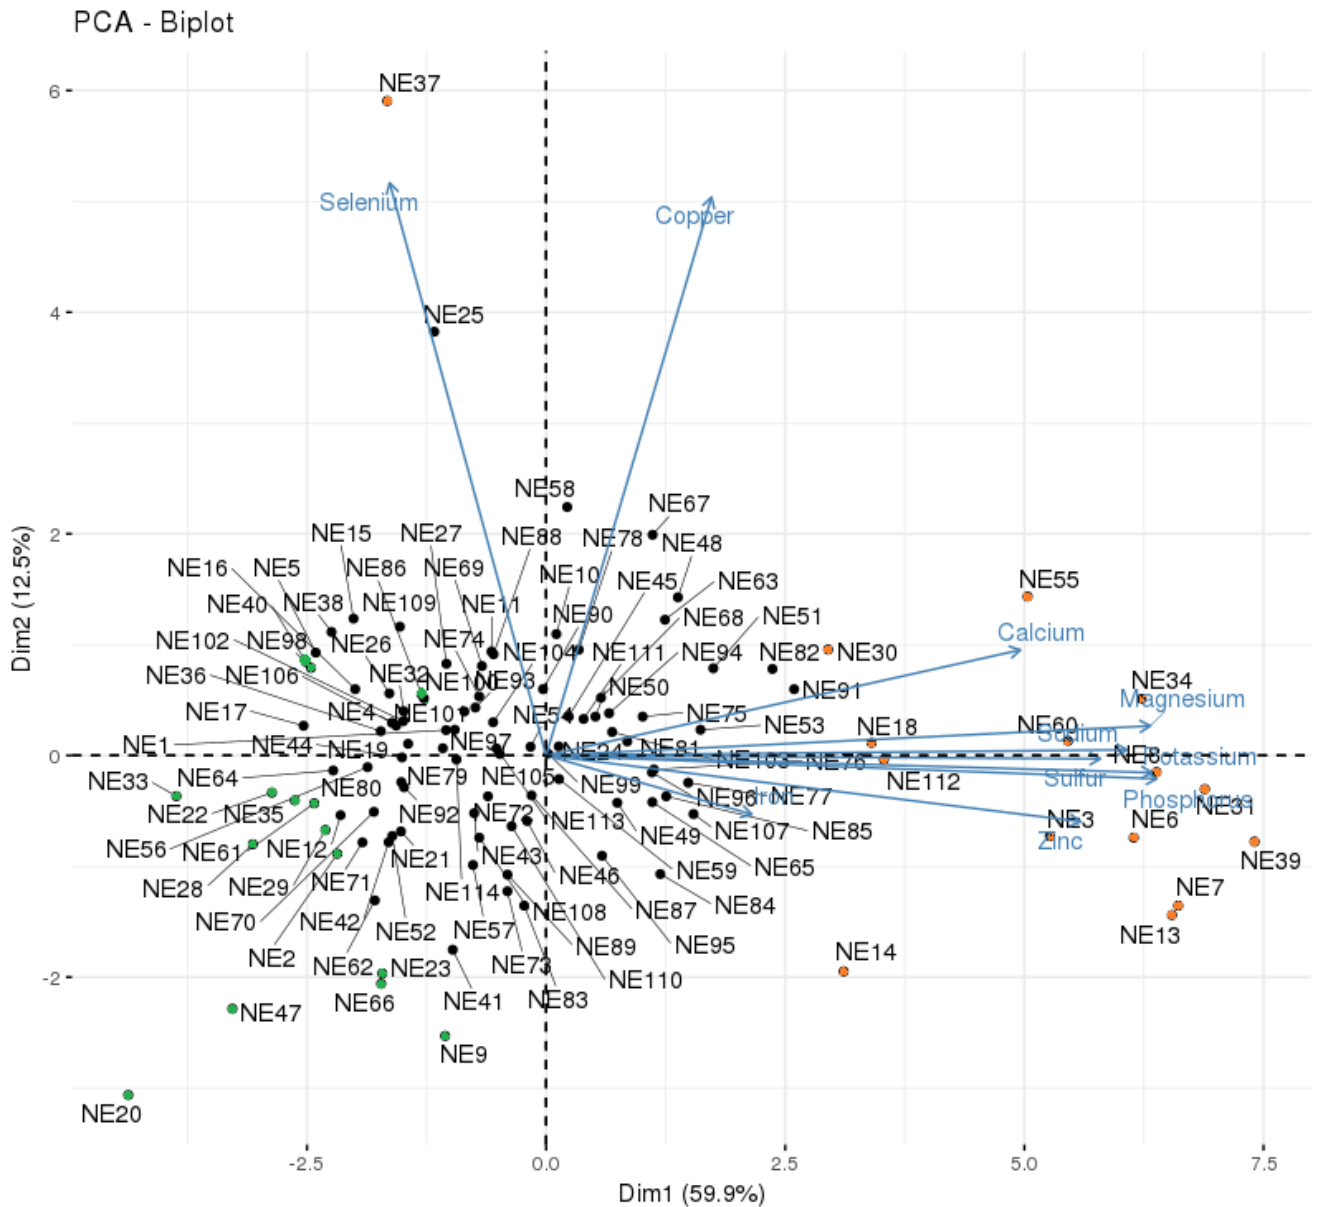

941  
942

943  
944  
945  
946  
947

948 **Figure 3. Co-expression networks among genes and miRNAs being part of enriched**  
949 **pathways (DEGs and correlated to a mineral), hubs, TFs, miRNAs or presenting a**  
950 **significant RIF regarding nine of the minerals in study.** A) Mg, B) Fe, C) Ca, D) Se, E) K,  
951 K, F) Na, G) Cu, H) P, I) S. Red lines represent the correlations with a significant RIF gene or  
952 miRNA.



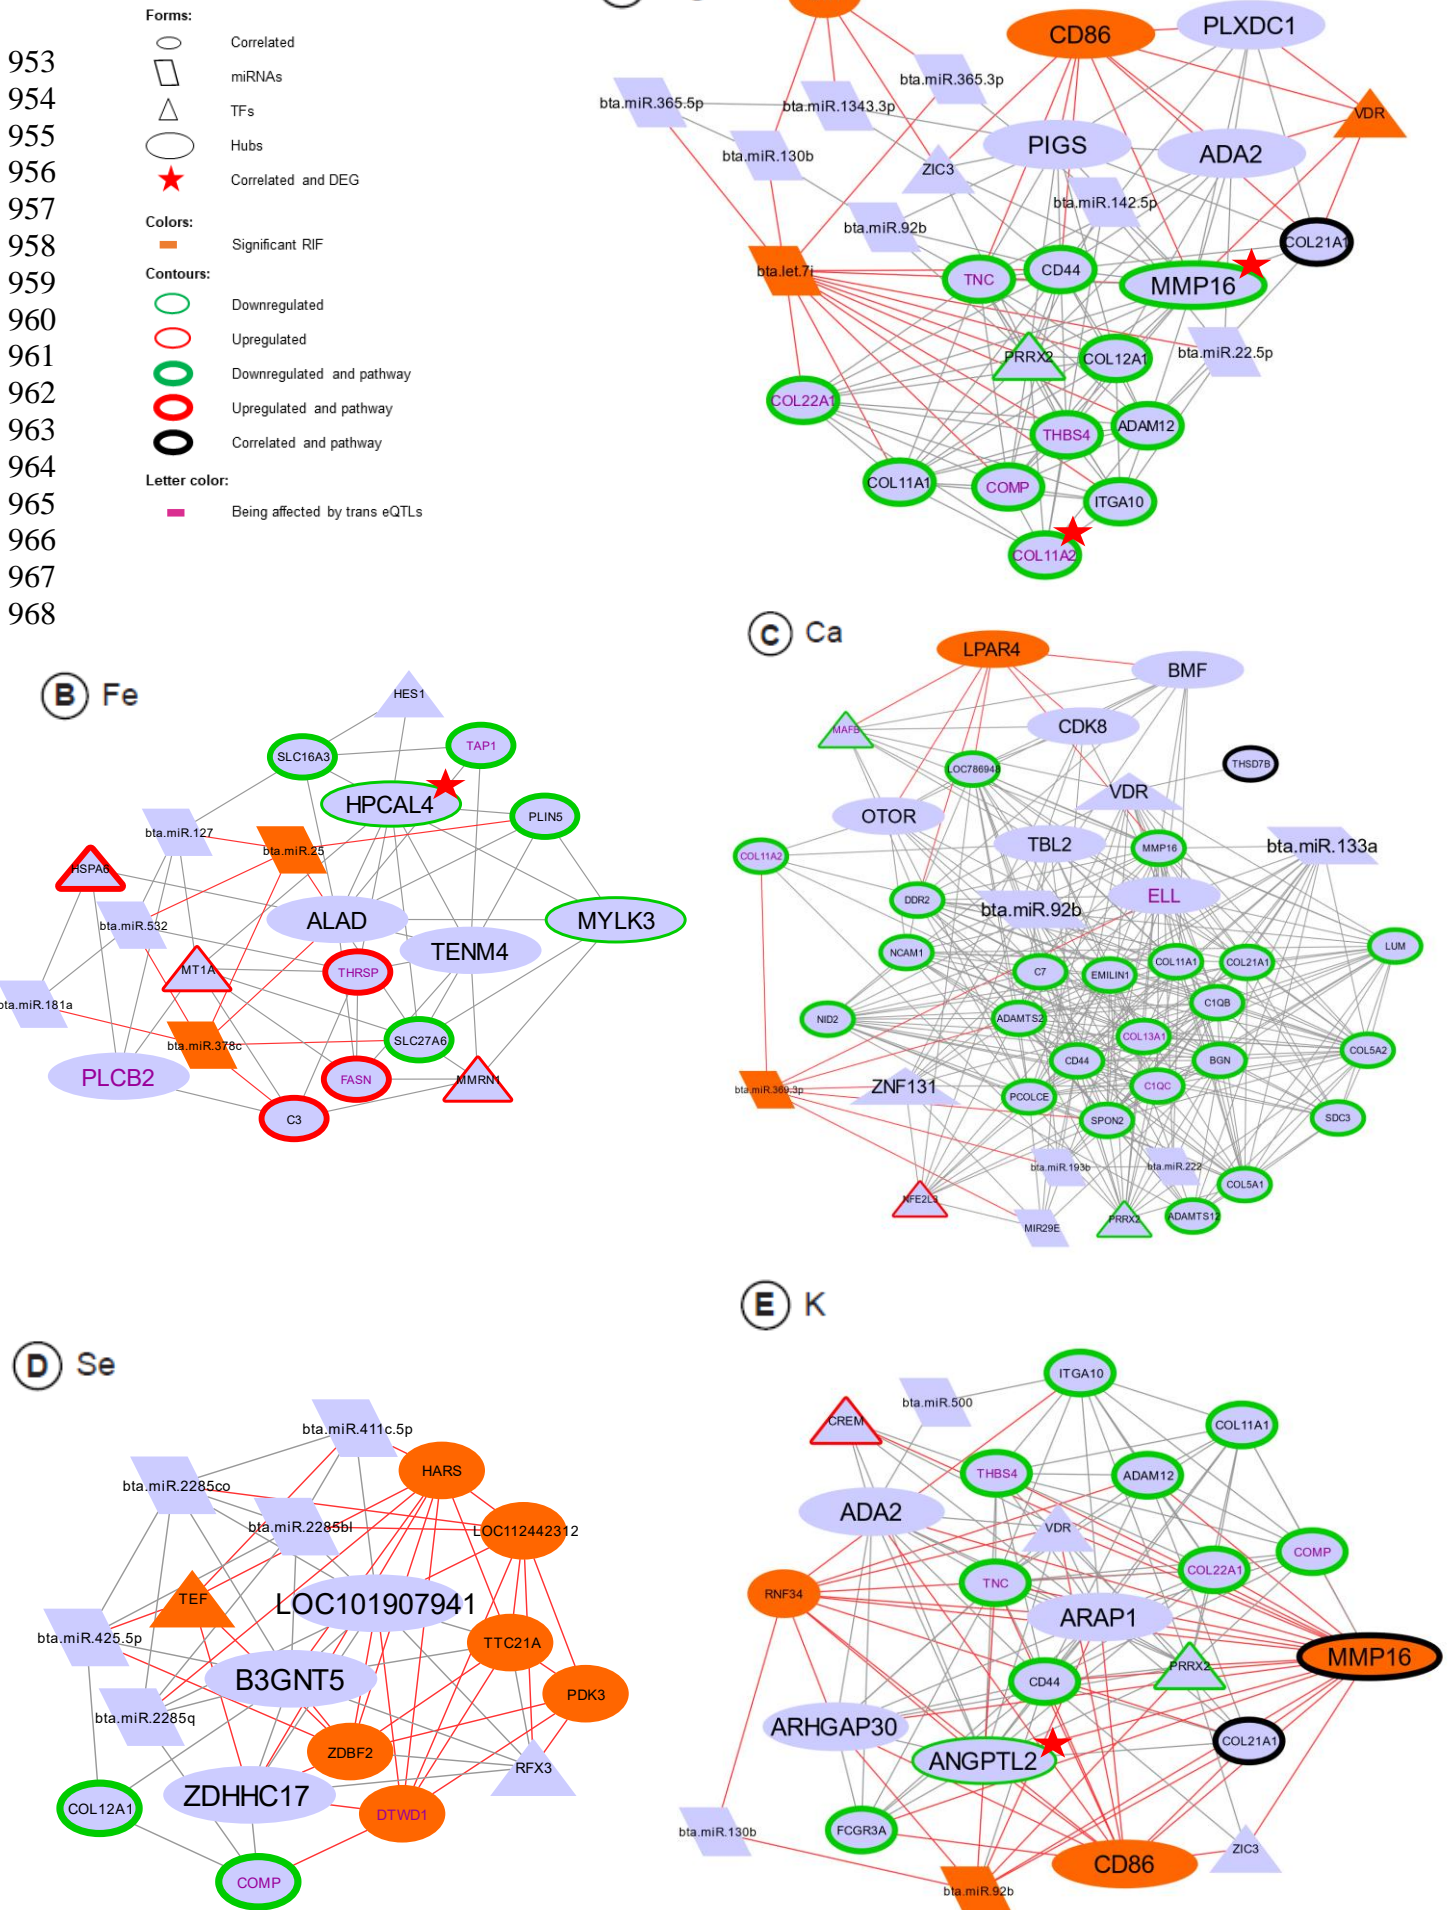

(F) Na

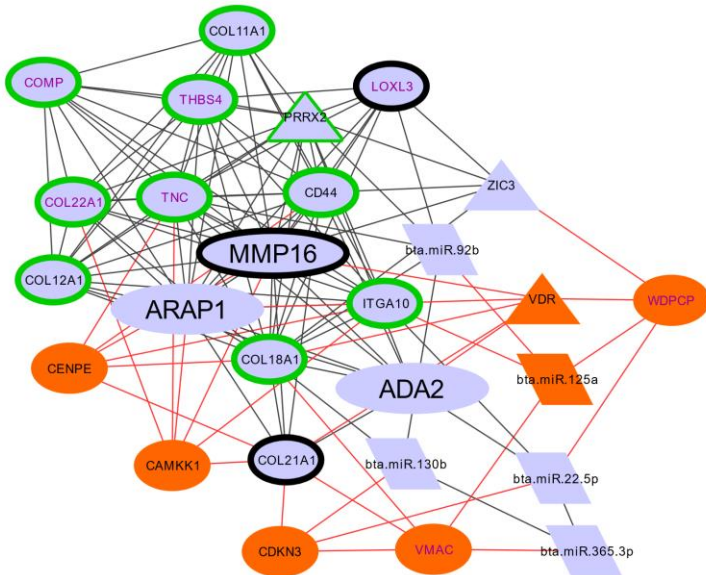

(G) Cu

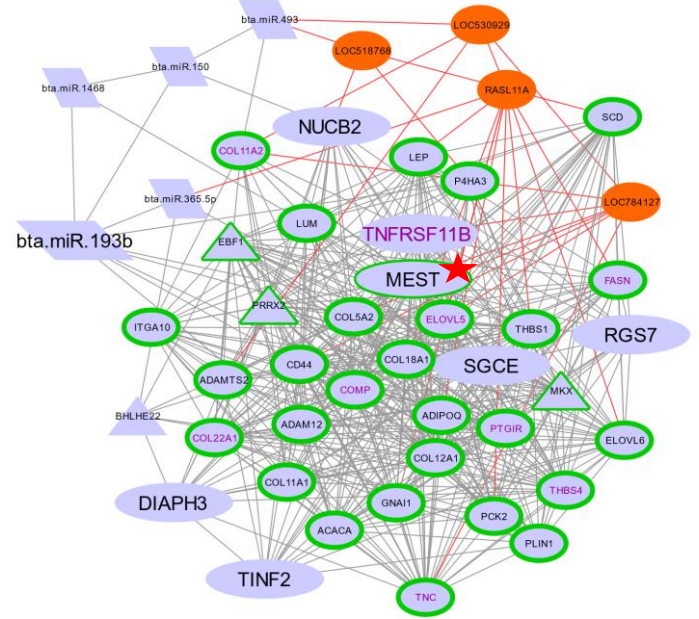

(H) P

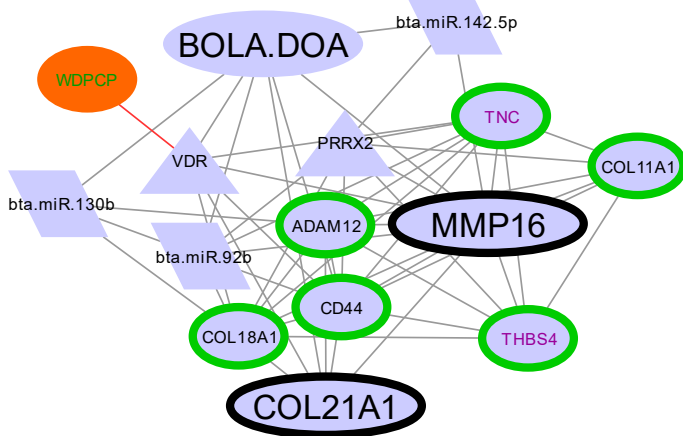

(I) S

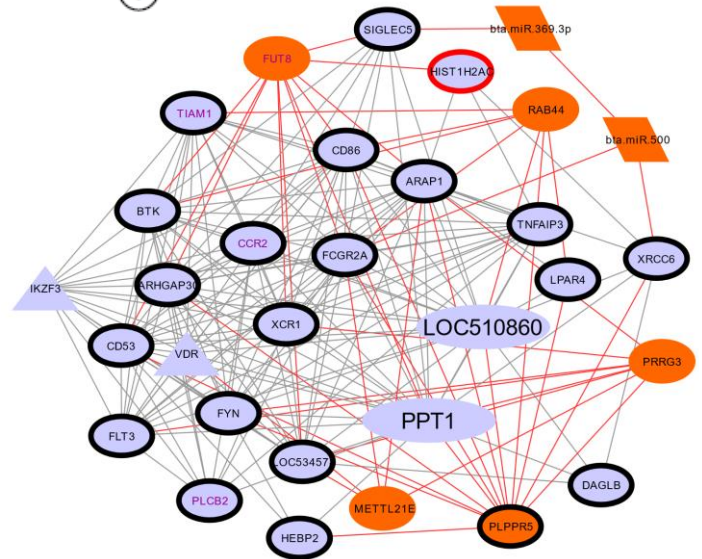

1035  
1036  
1037  
1038  
1039  
1040  
1041  
1042  
1043  
1044  
1045  
1046  
1047  
1048  
1049  
1050  
1051  
1052

1053 **Figure 4. Co-expression network containing DEGs for Zn, genes or miRNAs with**  
1054 **expression values that are correlated to these DEGs and are also a hub or a significant**  
1055 **RIF for Zn, ora miRNA correlated to Zn. Their functional attributes are presented in**  
1056 **different colors or shapes. Red lines represent the correlations with a significant RIF gene**  
1057 **or miRNA.**

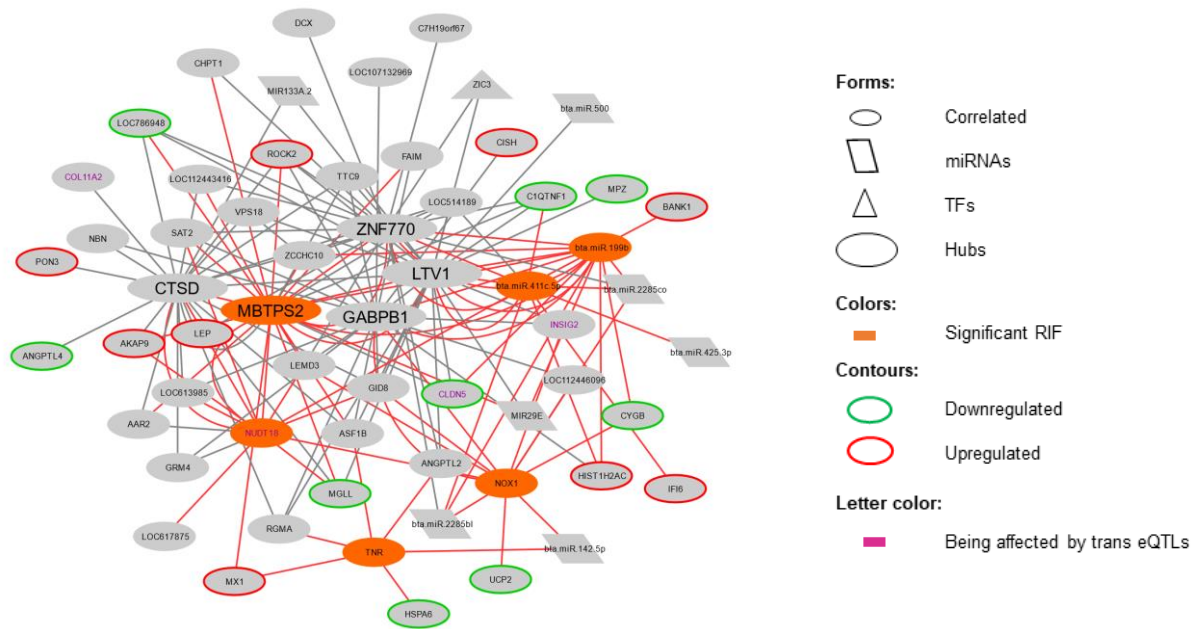

1053  
1054  
1055  
1056  
1057  
1058  
1059  
1060  
1061  
1062  
1063  
1064  
1065  
1066  
1067  
1068  
1069  
1070  
1071  
1072  
1073  
1074  
1075  
1076  
1077  
1078  
1079  
1080  
1081  
1082  
1083  
1084  
1085  
1086  
1087  
1088  
1089  
1090  
1091  
1092  
1093  
1094  
1095  
1096  
1097  
1098  
1099  
1100  
1101  
1102

1103  
1104

**Figure 5. Flowchart representing the steps of the methodology.**

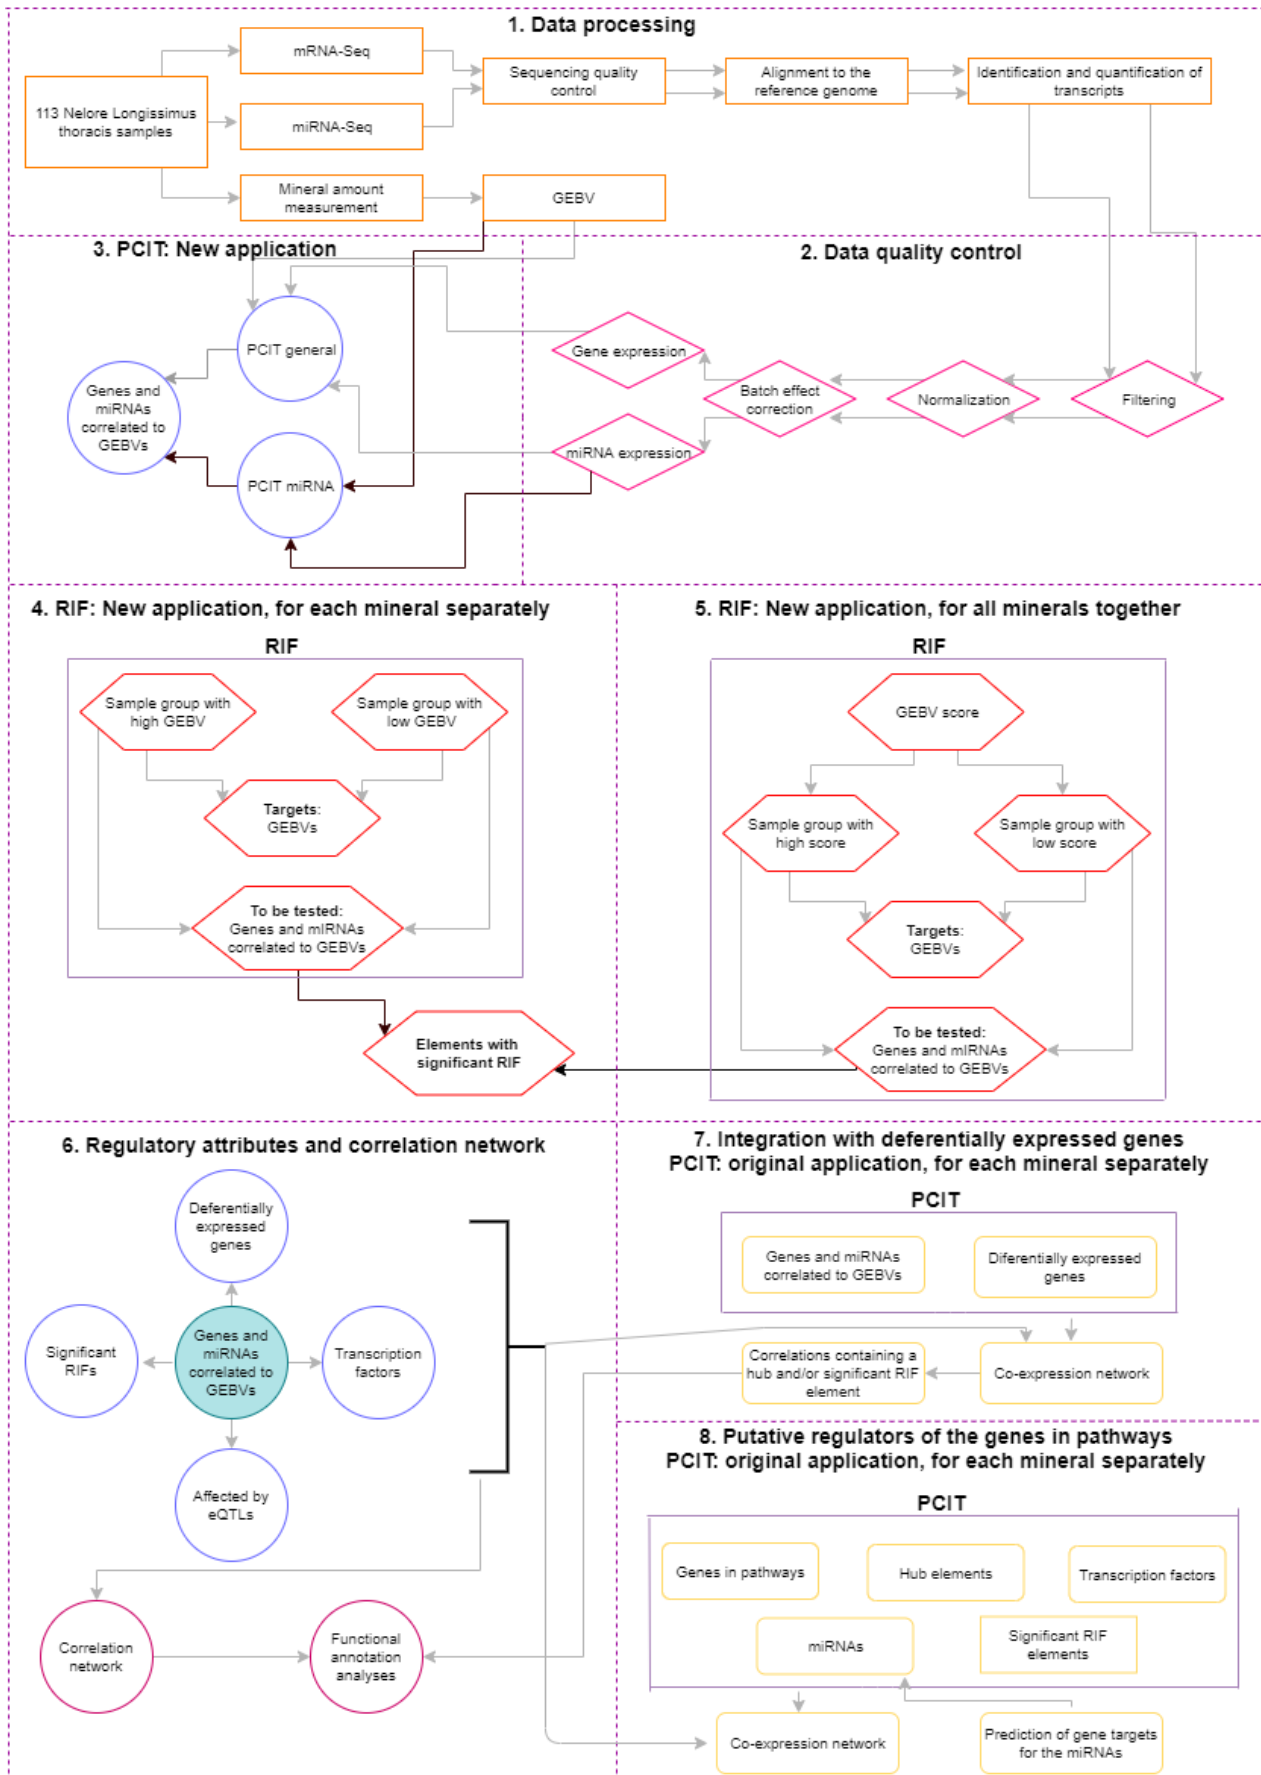

1105
